# Supplementary material
Source: publisher figshare collection journal article supplement (https://acs.figshare.com/ndownloader/files/4131526)
Supplement: Supplementary file 1 [file 4131526]

 
data_1Cl

 
_audit_creation_method            SHELXL-97
_chemical_name_systematic
;
 ?
;
_chemical_name_common             ?
_chemical_melting_point           ?
_chemical_formula_moiety          
 'C18 H18 Cl N2 O2 Ru, Cl'
_chemical_formula_sum
 'C18 H18 Cl2 N2 O2 Ru'
_chemical_formula_weight          466.31
 
loop_
 _atom_type_symbol
 _atom_type_description
 _atom_type_scat_dispersion_real
 _atom_type_scat_dispersion_imag
 _atom_type_scat_source
 'C'  'C'   0.0033   0.0016
 'International Tables Vol C Tables 4.2.6.8 and 6.1.1.4'
 'H'  'H'   0.0000   0.0000
 'International Tables Vol C Tables 4.2.6.8 and 6.1.1.4'
 'N'  'N'   0.0061   0.0033
 'International Tables Vol C Tables 4.2.6.8 and 6.1.1.4'
 'O'  'O'   0.0106   0.0060
 'International Tables Vol C Tables 4.2.6.8 and 6.1.1.4'
 'Cl'  'Cl'   0.1484   0.1585
 'International Tables Vol C Tables 4.2.6.8 and 6.1.1.4'
 'Ru'  'Ru'  -1.2594   0.8363
 'International Tables Vol C Tables 4.2.6.8 and 6.1.1.4'
 
_symmetry_cell_setting            monoclinic
_symmetry_space_group_name_H-M    C2/c
 
loop_
 _symmetry_equiv_pos_as_xyz
 'x, y, z'
 '-x, y, -z+1/2'
 'x+1/2, y+1/2, z'
 '-x+1/2, y+1/2, -z+1/2'
 '-x, -y, -z'
 'x, -y, z-1/2'
 '-x+1/2, -y+1/2, -z'
 'x+1/2, -y+1/2, z-1/2'
 
_cell_length_a                    25.049(8)
_cell_length_b                    7.694(2)
_cell_length_c                    21.812(7)
_cell_angle_alpha                 90.00
_cell_angle_beta                  95.872(5)
_cell_angle_gamma                 90.00
_cell_volume                      4181(2)
_cell_formula_units_Z             8
_cell_measurement_temperature     100(2)
_cell_measurement_reflns_used     7237
_cell_measurement_theta_min       2.359
_cell_measurement_theta_max       27.692
 
_exptl_crystal_description        prism
_exptl_crystal_colour             orange
_exptl_crystal_size_max           0.41
_exptl_crystal_size_mid           0.39
_exptl_crystal_size_min           0.32
_exptl_crystal_density_meas       ?
_exptl_crystal_density_diffrn     1.481
_exptl_crystal_density_method     'not measured'
_exptl_crystal_F_000              1872
_exptl_absorpt_coefficient_mu     1.018
_exptl_absorpt_correction_type    multi-scan
_exptl_absorpt_correction_T_min   0.6804
_exptl_absorpt_correction_T_max   0.7366
_exptl_absorpt_process_details    SADABS
 
_exptl_special_details
;
 ?
;
 
_diffrn_ambient_temperature       100(2)
_diffrn_radiation_wavelength      0.71073
_diffrn_radiation_type            MoK\a
_diffrn_radiation_source          'fine-focus sealed tube'
_diffrn_radiation_monochromator   graphite
_diffrn_measurement_device_type   'CCD area detector'
_diffrn_measurement_method        'omega and phi scans'
_diffrn_detector_area_resol_mean  ?
_diffrn_standards_number          ?
_diffrn_standards_interval_count  ?
_diffrn_standards_interval_time   ?
_diffrn_standards_decay_%         ?
_diffrn_reflns_number             19520
_diffrn_reflns_av_R_equivalents   0.0858
_diffrn_reflns_av_sigmaI/netI     0.0451
_diffrn_reflns_limit_h_min        -29
_diffrn_reflns_limit_h_max        29
_diffrn_reflns_limit_k_min        -9
_diffrn_reflns_limit_k_max        9
_diffrn_reflns_limit_l_min        -25
_diffrn_reflns_limit_l_max        25
_diffrn_reflns_theta_min          2.36
_diffrn_reflns_theta_max          25.00
_reflns_number_total              3684
_reflns_number_gt                 3457
_reflns_threshold_expression      >2sigma(I)
 
_computing_data_collection        ?
_computing_cell_refinement        ?
_computing_data_reduction         ?
_computing_structure_solution     ?
_computing_structure_refinement   'SHELXL-97 (Sheldrick, 1997)'
_computing_molecular_graphics     ?
_computing_publication_material   ?
 
_refine_special_details
;
 Refinement of F^2^ against ALL reflections.  The weighted R-factor wR and
 goodness of fit S are based on F^2^, conventional R-factors R are based
 on F, with F set to zero for negative F^2^. The threshold expression of
 F^2^ > 2sigma(F^2^) is used only for calculating R-factors(gt) etc. and is
 not relevant to the choice of reflections for refinement.  R-factors based
 on F^2^ are statistically about twice as large as those based on F, and R-
 factors based on ALL data will be even larger.
;

# SQUEEZE RESULTS (APPEND TO CIF)
loop_
  _platon_squeeze_void_nr
  _platon_squeeze_void_average_x
  _platon_squeeze_void_average_y
  _platon_squeeze_void_average_z
  _platon_squeeze_void_volume
  _platon_squeeze_void_count_electrons
  _platon_squeeze_void_content
   1  1.000 -0.084  0.250       183        39 ' '
   2  0.500 -0.021  0.250       183        39 ' '
   3  1.000  0.053  0.750       183        39 ' '
   4  0.500 -0.069  0.750       183        39 ' '
_platon_squeeze_details  ?

 
_refine_ls_structure_factor_coef  Fsqd
_refine_ls_matrix_type            full
_refine_ls_weighting_scheme       calc
_refine_ls_weighting_details
 'calc w=1/[\s^2^(Fo^2^)+(0.0205P)^2^+5.7578P] where P=(Fo^2^+2Fc^2^)/3'
_atom_sites_solution_primary      direct
_atom_sites_solution_secondary    difmap
_atom_sites_solution_hydrogens    geom
_refine_ls_hydrogen_treatment     constr
_refine_ls_extinction_method      none
_refine_ls_extinction_coef        ?
_refine_ls_number_reflns          3684
_refine_ls_number_parameters      228
_refine_ls_number_restraints      0
_refine_ls_R_factor_all           0.0310
_refine_ls_R_factor_gt            0.0289
_refine_ls_wR_factor_ref          0.0752
_refine_ls_wR_factor_gt           0.0740
_refine_ls_goodness_of_fit_ref    1.078
_refine_ls_restrained_S_all       1.078
_refine_ls_shift/su_max           0.000
_refine_ls_shift/su_mean          0.000
 
loop_
 _atom_site_label
 _atom_site_type_symbol
 _atom_site_fract_x
 _atom_site_fract_y
 _atom_site_fract_z
 _atom_site_U_iso_or_equiv
 _atom_site_adp_type
 _atom_site_occupancy
 _atom_site_symmetry_multiplicity
 _atom_site_calc_flag
 _atom_site_refinement_flags
 _atom_site_disorder_assembly
 _atom_site_disorder_group
Ru1 Ru 0.093028(8) 0.22340(3) 0.068865(9) 0.03373(9) Uani 1 1 d . . .
Cl1 Cl 0.08231(3) -0.06863(8) 0.10415(4) 0.0520(2) Uani 1 1 d . . .
Cl2 Cl 0.36919(4) 0.92679(14) 0.13152(4) 0.0717(3) Uani 1 1 d . . .
N1 N 0.15853(9) 0.2338(2) 0.13594(10) 0.0345(5) Uani 1 1 d . . .
N2 N 0.15575(8) 0.1213(3) 0.02476(9) 0.0352(5) Uani 1 1 d . . .
O1 O 0.29161(9) 0.2967(3) 0.26034(9) 0.0539(5) Uani 1 1 d . . .
O2 O 0.28537(8) -0.0964(3) -0.04778(8) 0.0452(5) Uani 1 1 d . . .
C1 C 0.15567(12) 0.2864(3) 0.19469(14) 0.0434(7) Uani 1 1 d . . .
H1 H 0.1222 0.3124 0.2072 0.052 Uiso 1 1 calc R . .
C2 C 0.19960(12) 0.3029(4) 0.23613(13) 0.0446(7) Uani 1 1 d . . .
H2 H 0.1960 0.3382 0.2763 0.053 Uiso 1 1 calc R . .
C3 C 0.24985(12) 0.2667(3) 0.21825(12) 0.0376(6) Uani 1 1 d . . .
C4 C 0.25334(10) 0.2033(3) 0.15902(11) 0.0324(5) Uani 1 1 d . . .
H4 H 0.2863 0.1721 0.1463 0.039 Uiso 1 1 calc R . .
C5 C 0.20673(10) 0.1875(3) 0.11955(11) 0.0286(5) Uani 1 1 d . . .
C11 C 0.34430(14) 0.2839(5) 0.24215(16) 0.0650(10) Uani 1 1 d . . .
H11A H 0.3504 0.1677 0.2284 0.097 Uiso 1 1 calc R . .
H11B H 0.3700 0.3111 0.2766 0.097 Uiso 1 1 calc R . .
H11C H 0.3482 0.3641 0.2092 0.097 Uiso 1 1 calc R . .
C6 C 0.20510(9) 0.1170(3) 0.05658(10) 0.0294(5) Uani 1 1 d . . .
C7 C 0.24849(10) 0.0458(3) 0.03210(11) 0.0314(5) Uani 1 1 d . . .
H7 H 0.2821 0.0458 0.0545 0.038 Uiso 1 1 calc R . .
C8 C 0.24142(10) -0.0267(3) -0.02697(11) 0.0348(5) Uani 1 1 d . . .
C9 C 0.19087(11) -0.0236(4) -0.05899(12) 0.0424(6) Uani 1 1 d . . .
H9 H 0.1849 -0.0713 -0.0983 0.051 Uiso 1 1 calc R . .
C10 C 0.14989(11) 0.0507(4) -0.03181(12) 0.0447(7) Uani 1 1 d . . .
H10 H 0.1160 0.0525 -0.0536 0.054 Uiso 1 1 calc R . .
C12 C 0.28015(13) -0.1710(4) -0.10867(12) 0.0460(7) Uani 1 1 d . . .
H12A H 0.2508 -0.2520 -0.1124 0.069 Uiso 1 1 calc R . .
H12B H 0.3127 -0.2304 -0.1155 0.069 Uiso 1 1 calc R . .
H12C H 0.2734 -0.0804 -0.1387 0.069 Uiso 1 1 calc R . .
C13 C 0.08462(14) 0.4866(5) 0.0336(3) 0.0821(14) Uani 1 1 d . . .
H13 H 0.1110 0.5659 0.0253 0.098 Uiso 1 1 calc R . .
C14 C 0.06366(18) 0.3763(6) -0.01057(19) 0.0797(13) Uani 1 1 d . . .
H14 H 0.0764 0.3788 -0.0492 0.096 Uiso 1 1 calc R . .
C15 C 0.0241(2) 0.2610(5) 0.0002(3) 0.0815(16) Uani 1 1 d . . .
H15 H 0.0095 0.1880 -0.0312 0.098 Uiso 1 1 calc R . .
C16 C 0.00646(15) 0.2535(6) 0.0563(4) 0.096(2) Uani 1 1 d . . .
H16 H -0.0198 0.1730 0.0638 0.115 Uiso 1 1 calc R . .
C17 C 0.0268(2) 0.3641(8) 0.1031(2) 0.0963(18) Uani 1 1 d . . .
H17 H 0.0142 0.3605 0.1417 0.116 Uiso 1 1 calc R . .
C18 C 0.0667(2) 0.4805(5) 0.0907(3) 0.0928(18) Uani 1 1 d . . .
H18 H 0.0813 0.5550 0.1215 0.111 Uiso 1 1 calc R . .
 
loop_
 _atom_site_aniso_label
 _atom_site_aniso_U_11
 _atom_site_aniso_U_22
 _atom_site_aniso_U_33
 _atom_site_aniso_U_23
 _atom_site_aniso_U_13
 _atom_site_aniso_U_12
Ru1 0.02799(14) 0.03296(13) 0.03908(15) 0.00193(8) -0.00219(10) 0.00502(7)
Cl1 0.0488(4) 0.0373(3) 0.0671(5) 0.0101(3) -0.0076(4) -0.0003(3)
Cl2 0.0588(5) 0.1007(7) 0.0566(5) 0.0025(5) 0.0096(4) 0.0068(5)
N1 0.0345(13) 0.0340(10) 0.0348(12) -0.0011(9) 0.0029(10) 0.0034(8)
N2 0.0326(11) 0.0392(11) 0.0320(11) -0.0009(9) -0.0051(9) 0.0054(9)
O1 0.0471(13) 0.0797(15) 0.0327(11) -0.0092(10) -0.0066(9) -0.0010(10)
O2 0.0420(11) 0.0582(11) 0.0358(10) -0.0097(9) 0.0058(8) 0.0059(9)
C1 0.0424(17) 0.0495(15) 0.0394(15) -0.0045(12) 0.0093(12) 0.0072(12)
C2 0.0496(18) 0.0538(16) 0.0306(14) -0.0041(12) 0.0051(12) 0.0053(13)
C3 0.0432(17) 0.0398(13) 0.0283(13) 0.0013(10) -0.0043(11) -0.0014(11)
C4 0.0315(13) 0.0360(12) 0.0296(12) 0.0004(10) 0.0023(10) 0.0025(10)
C5 0.0310(13) 0.0257(10) 0.0289(12) 0.0030(9) 0.0022(10) 0.0013(9)
C11 0.0429(19) 0.100(3) 0.0496(19) -0.0146(17) -0.0083(15) -0.0100(17)
C6 0.0331(13) 0.0264(11) 0.0282(12) 0.0042(9) -0.0001(10) 0.0010(9)
C7 0.0299(13) 0.0346(12) 0.0290(12) 0.0020(10) 0.0003(10) 0.0000(10)
C8 0.0398(14) 0.0325(12) 0.0325(13) 0.0020(10) 0.0052(10) 0.0012(10)
C9 0.0457(16) 0.0512(15) 0.0289(13) -0.0059(12) -0.0027(11) 0.0035(13)
C10 0.0386(15) 0.0584(17) 0.0347(14) -0.0038(13) -0.0077(11) 0.0052(13)
C12 0.0578(19) 0.0456(14) 0.0358(14) -0.0045(12) 0.0103(13) 0.0060(14)
C13 0.044(2) 0.0455(19) 0.152(4) 0.041(3) -0.014(2) 0.0066(15)
C14 0.081(3) 0.097(3) 0.063(2) 0.041(2) 0.013(2) 0.049(3)
C15 0.070(3) 0.062(2) 0.100(4) -0.014(2) -0.051(3) 0.029(2)
C16 0.0261(19) 0.067(2) 0.194(7) 0.054(3) 0.003(3) 0.0072(16)
C17 0.095(4) 0.118(4) 0.082(3) 0.036(3) 0.041(3) 0.080(3)
C18 0.106(4) 0.054(2) 0.105(4) -0.031(2) -0.054(3) 0.048(2)
 
_geom_special_details
;
 All esds (except the esd in the dihedral angle between two l.s. planes)
 are estimated using the full covariance matrix.  The cell esds are taken
 into account individually in the estimation of esds in distances, angles
 and torsion angles; correlations between esds in cell parameters are only
 used when they are defined by crystal symmetry.  An approximate (isotropic)
 treatment of cell esds is used for estimating esds involving l.s. planes.
;
 
loop_
 _geom_bond_atom_site_label_1
 _geom_bond_atom_site_label_2
 _geom_bond_distance
 _geom_bond_site_symmetry_2
 _geom_bond_publ_flag
Ru1 N2 2.078(2) . ?
Ru1 N1 2.085(2) . ?
Ru1 C18 2.154(3) . ?
Ru1 C14 2.160(3) . ?
Ru1 C13 2.169(3) . ?
Ru1 C16 2.170(4) . ?
Ru1 C17 2.176(4) . ?
Ru1 C15 2.186(3) . ?
Ru1 Cl1 2.3989(9) . ?
N1 C5 1.342(3) . ?
N1 C1 1.353(4) . ?
N2 C10 1.343(3) . ?
N2 C6 1.355(3) . ?
O1 C3 1.339(3) . ?
O1 C11 1.420(4) . ?
O2 C8 1.344(3) . ?
O2 C12 1.440(3) . ?
C1 C2 1.356(4) . ?
C2 C3 1.384(4) . ?
C3 C4 1.392(4) . ?
C4 C5 1.383(3) . ?
C5 C6 1.474(3) . ?
C6 C7 1.373(3) . ?
C7 C8 1.398(3) . ?
C8 C9 1.383(4) . ?
C9 C10 1.363(4) . ?
C13 C14 1.349(6) . ?
C13 C18 1.368(7) . ?
C14 C15 1.368(7) . ?
C15 C16 1.345(7) . ?
C16 C17 1.385(8) . ?
C17 C18 1.388(7) . ?
 
loop_
 _geom_angle_atom_site_label_1
 _geom_angle_atom_site_label_2
 _geom_angle_atom_site_label_3
 _geom_angle
 _geom_angle_site_symmetry_1
 _geom_angle_site_symmetry_3
 _geom_angle_publ_flag
N2 Ru1 N1 76.19(8) . . ?
N2 Ru1 C18 135.4(2) . . ?
N1 Ru1 C18 92.69(11) . . ?
N2 Ru1 C14 92.64(12) . . ?
N1 Ru1 C14 136.13(16) . . ?
C18 Ru1 C14 65.80(17) . . ?
N2 Ru1 C13 103.82(15) . . ?
N1 Ru1 C13 104.73(13) . . ?
C18 Ru1 C13 36.89(18) . . ?
C14 Ru1 C13 36.30(17) . . ?
N2 Ru1 C16 140.8(2) . . ?
N1 Ru1 C16 142.1(2) . . ?
C18 Ru1 C16 66.71(19) . . ?
C14 Ru1 C16 65.60(19) . . ?
C13 Ru1 C16 78.23(14) . . ?
N2 Ru1 C17 170.32(13) . . ?
N1 Ru1 C17 108.23(18) . . ?
C18 Ru1 C17 37.39(19) . . ?
C14 Ru1 C17 78.20(15) . . ?
C13 Ru1 C17 66.90(18) . . ?
C16 Ru1 C17 37.2(2) . . ?
N2 Ru1 C15 108.30(17) . . ?
N1 Ru1 C15 170.17(12) . . ?
C18 Ru1 C15 77.96(14) . . ?
C14 Ru1 C15 36.68(18) . . ?
C13 Ru1 C15 65.92(16) . . ?
C16 Ru1 C15 36.0(2) . . ?
C17 Ru1 C15 66.0(2) . . ?
N2 Ru1 Cl1 84.80(6) . . ?
N1 Ru1 Cl1 85.22(6) . . ?
C18 Ru1 Cl1 137.9(2) . . ?
C14 Ru1 Cl1 136.66(15) . . ?
C13 Ru1 Cl1 168.04(10) . . ?
C16 Ru1 Cl1 89.84(10) . . ?
C17 Ru1 Cl1 103.98(16) . . ?
C15 Ru1 Cl1 103.73(13) . . ?
C5 N1 C1 117.9(2) . . ?
C5 N1 Ru1 117.90(17) . . ?
C1 N1 Ru1 124.2(2) . . ?
C10 N2 C6 118.0(2) . . ?
C10 N2 Ru1 124.17(17) . . ?
C6 N2 Ru1 117.75(16) . . ?
C3 O1 C11 118.7(2) . . ?
C8 O2 C12 118.0(2) . . ?
N1 C1 C2 122.8(3) . . ?
C1 C2 C3 119.5(3) . . ?
O1 C3 C2 116.2(2) . . ?
O1 C3 C4 125.3(3) . . ?
C2 C3 C4 118.5(2) . . ?
C5 C4 C3 118.6(2) . . ?
N1 C5 C4 122.4(2) . . ?
N1 C5 C6 114.0(2) . . ?
C4 C5 C6 123.6(2) . . ?
N2 C6 C7 121.9(2) . . ?
N2 C6 C5 113.9(2) . . ?
C7 C6 C5 124.2(2) . . ?
C6 C7 C8 119.1(2) . . ?
O2 C8 C9 125.1(2) . . ?
O2 C8 C7 116.1(2) . . ?
C9 C8 C7 118.8(2) . . ?
C10 C9 C8 118.6(2) . . ?
N2 C10 C9 123.6(2) . . ?
C14 C13 C18 119.2(4) . . ?
C14 C13 Ru1 71.5(2) . . ?
C18 C13 Ru1 70.9(2) . . ?
C13 C14 C15 121.4(4) . . ?
C13 C14 Ru1 72.2(2) . . ?
C15 C14 Ru1 72.7(2) . . ?
C16 C15 C14 119.7(4) . . ?
C16 C15 Ru1 71.4(2) . . ?
C14 C15 Ru1 70.7(2) . . ?
C15 C16 C17 120.9(4) . . ?
C15 C16 Ru1 72.6(2) . . ?
C17 C16 Ru1 71.6(2) . . ?
C16 C17 C18 118.0(4) . . ?
C16 C17 Ru1 71.2(2) . . ?
C18 C17 Ru1 70.4(2) . . ?
C13 C18 C17 120.7(4) . . ?
C13 C18 Ru1 72.2(2) . . ?
C17 C18 Ru1 72.2(2) . . ?
 
_diffrn_measured_fraction_theta_max    0.999
_diffrn_reflns_theta_full              25.00
_diffrn_measured_fraction_theta_full   0.999
_refine_diff_density_max    0.667
_refine_diff_density_min   -0.478
_refine_diff_density_rms    0.073


#===END 

 
data_1TsOH2O
 
_audit_creation_method            SHELXL-97
_chemical_name_systematic
;
 ?
;
_chemical_name_common             ?
_chemical_melting_point           ?
_chemical_formula_moiety          
 'C18 H18 Cl N2 O2 Ru, C7 H7 O3 S, H2 O'
_chemical_formula_sum
 'C25 H27 Cl N2 O6 Ru S'
_chemical_formula_weight          620.07
 
loop_
 _atom_type_symbol
 _atom_type_description
 _atom_type_scat_dispersion_real
 _atom_type_scat_dispersion_imag
 _atom_type_scat_source
 'C'  'C'   0.0033   0.0016
 'International Tables Vol C Tables 4.2.6.8 and 6.1.1.4'
 'H'  'H'   0.0000   0.0000
 'International Tables Vol C Tables 4.2.6.8 and 6.1.1.4'
 'N'  'N'   0.0061   0.0033
 'International Tables Vol C Tables 4.2.6.8 and 6.1.1.4'
 'O'  'O'   0.0106   0.0060
 'International Tables Vol C Tables 4.2.6.8 and 6.1.1.4'
 'S'  'S'   0.1246   0.1234
 'International Tables Vol C Tables 4.2.6.8 and 6.1.1.4'
 'Cl'  'Cl'   0.1484   0.1585
 'International Tables Vol C Tables 4.2.6.8 and 6.1.1.4'
 'Ru'  'Ru'  -1.2594   0.8363
 'International Tables Vol C Tables 4.2.6.8 and 6.1.1.4'
 
_symmetry_cell_setting            triclinic
_symmetry_space_group_name_H-M    P-1
 
loop_
 _symmetry_equiv_pos_as_xyz
 'x, y, z'
 '-x, -y, -z'
 
_cell_length_a                    10.2994(19)
_cell_length_b                    12.021(2)
_cell_length_c                    12.158(2)
_cell_angle_alpha                 110.088(3)
_cell_angle_beta                  106.730(3)
_cell_angle_gamma                 107.296(3)
_cell_volume                      1215.4(4)
_cell_formula_units_Z             2
_cell_measurement_temperature     100(2)
_cell_measurement_reflns_used     5236
_cell_measurement_theta_min       2.291
_cell_measurement_theta_max       27.952
 
_exptl_crystal_description        plate
_exptl_crystal_colour             yellow
_exptl_crystal_size_max           0.40
_exptl_crystal_size_mid           0.40
_exptl_crystal_size_min           0.10
_exptl_crystal_density_meas       ?
_exptl_crystal_density_diffrn     1.694
_exptl_crystal_density_method     'not measured'
_exptl_crystal_F_000              632
_exptl_absorpt_coefficient_mu     0.887
_exptl_absorpt_correction_type    multi-scan
_exptl_absorpt_correction_T_min   0.7181
_exptl_absorpt_correction_T_max   0.9166
_exptl_absorpt_process_details    SADABS
 
_exptl_special_details
;
 ?
;
 
_diffrn_ambient_temperature       100(2)
_diffrn_radiation_wavelength      0.71073
_diffrn_radiation_type            MoK\a
_diffrn_radiation_source          'fine-focus sealed tube'
_diffrn_radiation_monochromator   graphite
_diffrn_measurement_device_type   'CCD area detector'
_diffrn_measurement_method        'omega and phi scans'
_diffrn_detector_area_resol_mean  ?
_diffrn_standards_number          ?
_diffrn_standards_interval_count  ?
_diffrn_standards_interval_time   ?
_diffrn_standards_decay_%         ?
_diffrn_reflns_number             12078
_diffrn_reflns_av_R_equivalents   0.0392
_diffrn_reflns_av_sigmaI/netI     0.0313
_diffrn_reflns_limit_h_min        -12
_diffrn_reflns_limit_h_max        12
_diffrn_reflns_limit_k_min        -14
_diffrn_reflns_limit_k_max        14
_diffrn_reflns_limit_l_min        -14
_diffrn_reflns_limit_l_max        14
_diffrn_reflns_theta_min          1.98
_diffrn_reflns_theta_max          25.00
_reflns_number_total              4284
_reflns_number_gt                 4137
_reflns_threshold_expression      >2sigma(I)
 
_computing_data_collection        ?
_computing_cell_refinement        ?
_computing_data_reduction         ?
_computing_structure_solution     ?
_computing_structure_refinement   'SHELXL-97 (Sheldrick, 1997)'
_computing_molecular_graphics     ?
_computing_publication_material   ?
 
_refine_special_details
;
 Refinement of F^2^ against ALL reflections.  The weighted R-factor wR and
 goodness of fit S are based on F^2^, conventional R-factors R are based
 on F, with F set to zero for negative F^2^. The threshold expression of
 F^2^ > 2sigma(F^2^) is used only for calculating R-factors(gt) etc. and is
 not relevant to the choice of reflections for refinement.  R-factors based
 on F^2^ are statistically about twice as large as those based on F, and R-
 factors based on ALL data will be even larger.
;
 
_refine_ls_structure_factor_coef  Fsqd
_refine_ls_matrix_type            full
_refine_ls_weighting_scheme       calc
_refine_ls_weighting_details
 'calc w=1/[\s^2^(Fo^2^)+(0.0378P)^2^+1.1164P] where P=(Fo^2^+2Fc^2^)/3'
_atom_sites_solution_primary      direct
_atom_sites_solution_secondary    difmap
_atom_sites_solution_hydrogens    geom
_refine_ls_hydrogen_treatment     constr
_refine_ls_extinction_method      none
_refine_ls_extinction_coef        ?
_refine_ls_number_reflns          4284
_refine_ls_number_parameters      330
_refine_ls_number_restraints      0
_refine_ls_R_factor_all           0.0246
_refine_ls_R_factor_gt            0.0240
_refine_ls_wR_factor_ref          0.0644
_refine_ls_wR_factor_gt           0.0640
_refine_ls_goodness_of_fit_ref    0.982
_refine_ls_restrained_S_all       0.982
_refine_ls_shift/su_max           0.001
_refine_ls_shift/su_mean          0.000
 
loop_
 _atom_site_label
 _atom_site_type_symbol
 _atom_site_fract_x
 _atom_site_fract_y
 _atom_site_fract_z
 _atom_site_U_iso_or_equiv
 _atom_site_adp_type
 _atom_site_occupancy
 _atom_site_symmetry_multiplicity
 _atom_site_calc_flag
 _atom_site_refinement_flags
 _atom_site_disorder_assembly
 _atom_site_disorder_group
Ru1 Ru 0.953738(17) 0.213967(15) 0.792777(15) 0.01006(7) Uani 1 1 d . . .
S1 S 0.62570(6) 0.78152(5) 0.39136(5) 0.01438(12) Uani 1 1 d . . .
Cl1 Cl 1.10616(6) 0.31982(5) 1.02510(5) 0.01485(12) Uani 1 1 d . . .
N1 N 0.80701(19) 0.08405(17) 0.82798(16) 0.0113(3) Uani 1 1 d . . .
N2 N 1.03254(19) 0.07240(17) 0.78274(16) 0.0115(4) Uani 1 1 d . . .
O1 O 0.54052(17) -0.16170(15) 0.92386(15) 0.0160(3) Uani 1 1 d . . .
O2 O 1.18795(17) -0.20829(15) 0.76827(15) 0.0183(3) Uani 1 1 d . . .
O3 O 0.56854(17) 0.87295(16) 0.36892(16) 0.0207(3) Uani 1 1 d . . .
O4 O 0.61818(17) 0.68580(15) 0.27279(15) 0.0194(3) Uani 1 1 d . . .
O5 O 0.77437(17) 0.84739(15) 0.49979(15) 0.0196(3) Uani 1 1 d . . .
C1 C 0.6935(2) 0.1010(2) 0.8544(2) 0.0148(4) Uani 1 1 d . . .
H1 H 0.6744 0.1708 0.8506 0.018 Uiso 1 1 calc R . .
C2 C 0.6055(2) 0.0197(2) 0.8866(2) 0.0150(4) Uani 1 1 d . . .
H2 H 0.5286 0.0345 0.9046 0.018 Uiso 1 1 calc R . .
C3 C 0.6324(2) -0.0858(2) 0.8923(2) 0.0132(4) Uani 1 1 d . . .
C4 C 0.7498(2) -0.1045(2) 0.8659(2) 0.0128(4) Uani 1 1 d . . .
H4 H 0.7709 -0.1735 0.8695 0.015 Uiso 1 1 calc R . .
C5 C 0.8341(2) -0.0179(2) 0.83408(19) 0.0112(4) Uani 1 1 d . . .
C6 C 0.9626(2) -0.0254(2) 0.80610(19) 0.0111(4) Uani 1 1 d . . .
C7 C 1.0100(2) -0.1223(2) 0.80461(19) 0.0123(4) Uani 1 1 d . . .
H7 H 0.9620 -0.1873 0.8234 0.015 Uiso 1 1 calc R . .
C8 C 1.1307(2) -0.1203(2) 0.7743(2) 0.0127(4) Uani 1 1 d . . .
C9 C 1.2015(2) -0.0203(2) 0.7492(2) 0.0141(4) Uani 1 1 d . . .
H9 H 1.2820 -0.0176 0.7282 0.017 Uiso 1 1 calc R . .
C10 C 1.1512(2) 0.0743(2) 0.7560(2) 0.0135(4) Uani 1 1 d . . .
H10 H 1.2008 0.1424 0.7415 0.016 Uiso 1 1 calc R . .
C11 C 0.5517(3) -0.2799(2) 0.9173(2) 0.0189(5) Uani 1 1 d . . .
H11A H 0.5324 -0.3363 0.8304 0.028 Uiso 1 1 calc R . .
H11B H 0.4789 -0.3250 0.9405 0.028 Uiso 1 1 calc R . .
H11C H 0.6514 -0.2574 0.9766 0.028 Uiso 1 1 calc R . .
C12 C 1.1243(3) -0.3105(2) 0.7992(2) 0.0192(5) Uani 1 1 d . . .
H12A H 1.1252 -0.2717 0.8830 0.029 Uiso 1 1 calc R . .
H12B H 1.1828 -0.3594 0.8005 0.029 Uiso 1 1 calc R . .
H12C H 1.0222 -0.3687 0.7346 0.029 Uiso 1 1 calc R . .
C13 C 0.9892(3) 0.4084(2) 0.8081(2) 0.0226(5) Uani 1 1 d . . .
H13 H 1.0339 0.4900 0.8815 0.027 Uiso 1 1 calc R . .
C14 C 1.0798(3) 0.3651(2) 0.7524(2) 0.0193(5) Uani 1 1 d . . .
H14 H 1.1833 0.4173 0.7892 0.023 Uiso 1 1 calc R . .
C15 C 1.0114(3) 0.2428(2) 0.6413(2) 0.0182(5) Uani 1 1 d . . .
H15 H 1.0696 0.2150 0.6026 0.022 Uiso 1 1 calc R . .
C16 C 0.8545(3) 0.1606(2) 0.5868(2) 0.0192(5) Uani 1 1 d . . .
H16 H 0.8097 0.0787 0.5137 0.023 Uiso 1 1 calc R . .
C17 C 0.7677(3) 0.2049(3) 0.6453(2) 0.0232(5) Uani 1 1 d . . .
H17 H 0.6652 0.1509 0.6117 0.028 Uiso 1 1 calc R . .
C18 C 0.8344(3) 0.3306(2) 0.7545(2) 0.0231(5) Uani 1 1 d . . .
H18 H 0.7755 0.3611 0.7903 0.028 Uiso 1 1 calc R . .
C19 C 0.5004(2) 0.6875(2) 0.4345(2) 0.0137(4) Uani 1 1 d . . .
C20 C 0.4241(2) 0.5519(2) 0.3620(2) 0.0162(4) Uani 1 1 d . . .
H20 H 0.4380 0.5091 0.2896 0.019 Uiso 1 1 calc R . .
C21 C 0.3268(2) 0.4793(2) 0.3969(2) 0.0175(5) Uani 1 1 d . . .
H21 H 0.2770 0.3878 0.3481 0.021 Uiso 1 1 calc R . .
C22 C 0.3024(2) 0.5407(2) 0.5033(2) 0.0165(4) Uani 1 1 d . . .
C23 C 0.3777(2) 0.6779(2) 0.5742(2) 0.0169(5) Uani 1 1 d . . .
H23 H 0.3607 0.7209 0.6445 0.020 Uiso 1 1 calc R . .
C24 C 0.4770(2) 0.7510(2) 0.5419(2) 0.0153(4) Uani 1 1 d . . .
H24 H 0.5282 0.8423 0.5915 0.018 Uiso 1 1 calc R . .
C25 C 0.1999(3) 0.4607(2) 0.5425(2) 0.0228(5) Uani 1 1 d . . .
H25A H 0.2571 0.4750 0.6280 0.034 Uiso 1 1 calc R . .
H25B H 0.1565 0.3688 0.4817 0.034 Uiso 1 1 calc R . .
H25C H 0.1209 0.4874 0.5427 0.034 Uiso 1 1 calc R . .
O9 O 0.34497(19) -0.40940(17) 1.05220(16) 0.0267(4) Uani 1 1 d . . .
H1A H 0.2858 -0.4971 1.0338 0.063(11) Uiso 1 1 d R . .
H1B H 0.4369 -0.3774 1.1231 0.073(12) Uiso 1 1 d R . .
 
loop_
 _atom_site_aniso_label
 _atom_site_aniso_U_11
 _atom_site_aniso_U_22
 _atom_site_aniso_U_33
 _atom_site_aniso_U_23
 _atom_site_aniso_U_13
 _atom_site_aniso_U_12
Ru1 0.01085(10) 0.01141(10) 0.01192(11) 0.00733(8) 0.00619(8) 0.00639(8)
S1 0.0114(3) 0.0166(3) 0.0165(3) 0.0089(2) 0.0071(2) 0.0055(2)
Cl1 0.0160(3) 0.0155(3) 0.0137(3) 0.0078(2) 0.0058(2) 0.0072(2)
N1 0.0106(8) 0.0124(9) 0.0118(9) 0.0062(7) 0.0046(7) 0.0057(7)
N2 0.0114(8) 0.0135(9) 0.0120(8) 0.0079(7) 0.0052(7) 0.0059(7)
O1 0.0164(8) 0.0182(8) 0.0225(8) 0.0130(7) 0.0140(7) 0.0095(7)
O2 0.0211(8) 0.0214(8) 0.0286(9) 0.0176(7) 0.0173(7) 0.0160(7)
O3 0.0171(8) 0.0226(8) 0.0298(9) 0.0180(7) 0.0117(7) 0.0098(7)
O4 0.0174(8) 0.0222(8) 0.0184(8) 0.0089(7) 0.0112(7) 0.0059(7)
O5 0.0118(7) 0.0210(8) 0.0213(8) 0.0082(7) 0.0050(7) 0.0055(7)
C1 0.0149(11) 0.0168(11) 0.0151(11) 0.0078(9) 0.0066(9) 0.0095(9)
C2 0.0125(10) 0.0203(11) 0.0157(11) 0.0084(9) 0.0080(9) 0.0097(9)
C3 0.0123(10) 0.0175(11) 0.0100(10) 0.0069(9) 0.0057(8) 0.0055(9)
C4 0.0134(10) 0.0127(10) 0.0126(10) 0.0058(8) 0.0051(9) 0.0068(9)
C5 0.0115(10) 0.0128(10) 0.0074(9) 0.0039(8) 0.0026(8) 0.0053(8)
C6 0.0101(10) 0.0127(10) 0.0084(9) 0.0039(8) 0.0030(8) 0.0045(8)
C7 0.0140(10) 0.0123(10) 0.0112(10) 0.0063(8) 0.0055(8) 0.0056(9)
C8 0.0143(10) 0.0137(10) 0.0109(10) 0.0054(8) 0.0051(8) 0.0078(9)
C9 0.0125(10) 0.0182(11) 0.0150(10) 0.0084(9) 0.0079(9) 0.0083(9)
C10 0.0126(10) 0.0167(11) 0.0142(10) 0.0089(9) 0.0076(9) 0.0065(9)
C11 0.0194(11) 0.0192(11) 0.0281(13) 0.0162(10) 0.0148(10) 0.0102(10)
C12 0.0236(12) 0.0186(11) 0.0273(12) 0.0157(10) 0.0154(10) 0.0139(10)
C13 0.0405(15) 0.0146(11) 0.0188(12) 0.0124(10) 0.0121(11) 0.0148(11)
C14 0.0172(11) 0.0197(12) 0.0227(12) 0.0170(10) 0.0064(10) 0.0040(10)
C15 0.0249(12) 0.0287(12) 0.0196(12) 0.0199(10) 0.0154(10) 0.0189(10)
C16 0.0289(13) 0.0177(11) 0.0103(10) 0.0091(9) 0.0049(9) 0.0099(10)
C17 0.0144(11) 0.0363(14) 0.0280(13) 0.0273(12) 0.0059(10) 0.0110(10)
C18 0.0344(14) 0.0362(14) 0.0292(13) 0.0273(12) 0.0236(12) 0.0294(12)
C19 0.0103(10) 0.0186(11) 0.0150(11) 0.0103(9) 0.0050(9) 0.0075(9)
C20 0.0155(11) 0.0187(11) 0.0163(11) 0.0079(9) 0.0082(9) 0.0087(9)
C21 0.0157(11) 0.0141(11) 0.0190(11) 0.0070(9) 0.0056(9) 0.0048(9)
C22 0.0136(10) 0.0239(12) 0.0186(11) 0.0153(10) 0.0072(9) 0.0098(9)
C23 0.0184(11) 0.0230(12) 0.0137(11) 0.0099(9) 0.0084(9) 0.0118(10)
C24 0.0161(11) 0.0156(11) 0.0123(10) 0.0060(9) 0.0041(9) 0.0072(9)
C25 0.0204(12) 0.0268(13) 0.0244(12) 0.0156(11) 0.0117(10) 0.0082(10)
O9 0.0219(9) 0.0284(10) 0.0235(9) 0.0135(8) 0.0071(7) 0.0046(8)
 
_geom_special_details
;
 All esds (except the esd in the dihedral angle between two l.s. planes)
 are estimated using the full covariance matrix.  The cell esds are taken
 into account individually in the estimation of esds in distances, angles
 and torsion angles; correlations between esds in cell parameters are only
 used when they are defined by crystal symmetry.  An approximate (isotropic)
 treatment of cell esds is used for estimating esds involving l.s. planes.
;
 
loop_
 _geom_bond_atom_site_label_1
 _geom_bond_atom_site_label_2
 _geom_bond_distance
 _geom_bond_site_symmetry_2
 _geom_bond_publ_flag
Ru1 N2 2.0749(17) . ?
Ru1 N1 2.0818(18) . ?
Ru1 C17 2.159(2) . ?
Ru1 C16 2.181(2) . ?
Ru1 C13 2.187(2) . ?
Ru1 C14 2.192(2) . ?
Ru1 C15 2.193(2) . ?
Ru1 C18 2.199(2) . ?
Ru1 Cl1 2.4192(7) . ?
S1 O5 1.4524(16) . ?
S1 O3 1.4584(16) . ?
S1 O4 1.4668(16) . ?
S1 C19 1.774(2) . ?
N1 C1 1.351(3) . ?
N1 C5 1.356(3) . ?
N2 C10 1.348(3) . ?
N2 C6 1.350(3) . ?
O1 C3 1.346(3) . ?
O1 C11 1.436(3) . ?
O2 C8 1.347(2) . ?
O2 C12 1.435(3) . ?
C1 C2 1.367(3) . ?
C2 C3 1.396(3) . ?
C3 C4 1.397(3) . ?
C4 C5 1.386(3) . ?
C5 C6 1.478(3) . ?
C6 C7 1.387(3) . ?
C7 C8 1.390(3) . ?
C8 C9 1.389(3) . ?
C9 C10 1.371(3) . ?
C13 C18 1.392(4) . ?
C13 C14 1.418(3) . ?
C14 C15 1.397(3) . ?
C15 C16 1.419(3) . ?
C16 C17 1.406(3) . ?
C17 C18 1.414(4) . ?
C19 C20 1.380(3) . ?
C19 C24 1.396(3) . ?
C20 C21 1.388(3) . ?
C21 C22 1.387(3) . ?
C22 C23 1.393(3) . ?
C22 C25 1.505(3) . ?
C23 C24 1.381(3) . ?
 
loop_
 _geom_angle_atom_site_label_1
 _geom_angle_atom_site_label_2
 _geom_angle_atom_site_label_3
 _geom_angle
 _geom_angle_site_symmetry_1
 _geom_angle_site_symmetry_3
 _geom_angle_publ_flag
N2 Ru1 N1 76.31(7) . . ?
N2 Ru1 C17 128.60(9) . . ?
N1 Ru1 C17 91.66(8) . . ?
N2 Ru1 C16 99.36(8) . . ?
N1 Ru1 C16 109.27(8) . . ?
C17 Ru1 C16 37.78(9) . . ?
N2 Ru1 C13 149.39(9) . . ?
N1 Ru1 C13 133.09(8) . . ?
C17 Ru1 C13 67.70(9) . . ?
C16 Ru1 C13 80.23(9) . . ?
N2 Ru1 C14 113.44(8) . . ?
N1 Ru1 C14 170.04(8) . . ?
C17 Ru1 C14 80.62(9) . . ?
C16 Ru1 C14 68.12(9) . . ?
C13 Ru1 C14 37.79(9) . . ?
N2 Ru1 C15 93.49(7) . . ?
N1 Ru1 C15 144.32(8) . . ?
C17 Ru1 C15 67.95(9) . . ?
C16 Ru1 C15 37.85(9) . . ?
C13 Ru1 C15 67.29(9) . . ?
C14 Ru1 C15 37.16(9) . . ?
N2 Ru1 C18 166.38(8) . . ?
N1 Ru1 C18 102.35(8) . . ?
C17 Ru1 C18 37.84(10) . . ?
C16 Ru1 C18 68.05(9) . . ?
C13 Ru1 C18 37.00(10) . . ?
C14 Ru1 C18 67.70(9) . . ?
C15 Ru1 C18 79.71(8) . . ?
N2 Ru1 Cl1 85.99(5) . . ?
N1 Ru1 Cl1 84.15(5) . . ?
C17 Ru1 Cl1 143.12(7) . . ?
C16 Ru1 Cl1 166.34(6) . . ?
C13 Ru1 Cl1 88.76(6) . . ?
C14 Ru1 Cl1 98.22(6) . . ?
C15 Ru1 Cl1 129.80(7) . . ?
C18 Ru1 Cl1 107.45(7) . . ?
O5 S1 O3 113.14(10) . . ?
O5 S1 O4 112.35(9) . . ?
O3 S1 O4 112.42(10) . . ?
O5 S1 C19 106.55(10) . . ?
O3 S1 C19 106.10(9) . . ?
O4 S1 C19 105.60(10) . . ?
C1 N1 C5 118.20(18) . . ?
C1 N1 Ru1 123.74(14) . . ?
C5 N1 Ru1 117.87(13) . . ?
C10 N2 C6 118.50(17) . . ?
C10 N2 Ru1 123.27(14) . . ?
C6 N2 Ru1 118.22(13) . . ?
C3 O1 C11 118.27(16) . . ?
C8 O2 C12 118.46(16) . . ?
N1 C1 C2 122.70(19) . . ?
C1 C2 C3 119.33(19) . . ?
O1 C3 C2 115.77(18) . . ?
O1 C3 C4 125.47(19) . . ?
C2 C3 C4 118.77(19) . . ?
C5 C4 C3 118.55(19) . . ?
N1 C5 C4 122.45(18) . . ?
N1 C5 C6 113.62(18) . . ?
C4 C5 C6 123.92(18) . . ?
N2 C6 C7 122.14(18) . . ?
N2 C6 C5 113.87(17) . . ?
C7 C6 C5 123.98(19) . . ?
C6 C7 C8 118.59(19) . . ?
O2 C8 C7 125.13(19) . . ?
O2 C8 C9 115.74(18) . . ?
C7 C8 C9 119.12(19) . . ?
C10 C9 C8 119.05(19) . . ?
N2 C10 C9 122.55(19) . . ?
C18 C13 C14 121.0(2) . . ?
C18 C13 Ru1 71.95(13) . . ?
C14 C13 Ru1 71.28(13) . . ?
C15 C14 C13 119.1(2) . . ?
C15 C14 Ru1 71.47(13) . . ?
C13 C14 Ru1 70.93(13) . . ?
C14 C15 C16 120.9(2) . . ?
C14 C15 Ru1 71.37(13) . . ?
C16 C15 Ru1 70.63(12) . . ?
C17 C16 C15 118.9(2) . . ?
C17 C16 Ru1 70.26(13) . . ?
C15 C16 Ru1 71.52(12) . . ?
C16 C17 C18 120.8(2) . . ?
C16 C17 Ru1 71.96(13) . . ?
C18 C17 Ru1 72.60(13) . . ?
C13 C18 C17 119.3(2) . . ?
C13 C18 Ru1 71.05(13) . . ?
C17 C18 Ru1 69.56(12) . . ?
C20 C19 C24 119.5(2) . . ?
C20 C19 S1 120.61(17) . . ?
C24 C19 S1 119.91(17) . . ?
C19 C20 C21 120.1(2) . . ?
C22 C21 C20 121.1(2) . . ?
C21 C22 C23 118.2(2) . . ?
C21 C22 C25 120.7(2) . . ?
C23 C22 C25 121.1(2) . . ?
C24 C23 C22 121.2(2) . . ?
C23 C24 C19 119.9(2) . . ?
 
_diffrn_measured_fraction_theta_max    0.997
_diffrn_reflns_theta_full              25.00
_diffrn_measured_fraction_theta_full   0.997
_refine_diff_density_max    0.685
_refine_diff_density_min   -0.500
_refine_diff_density_rms    0.076


#====END

 
data_2BF4
 
_audit_creation_method            SHELXL-97
_chemical_name_systematic
;
 ?
;
_chemical_name_common             ?
_chemical_melting_point           ?
_chemical_formula_moiety          ?
_chemical_formula_sum
 'C22 H26 B Cl F4 N2 O2 Ru'
_chemical_formula_weight          573.78
 
loop_
 _atom_type_symbol
 _atom_type_description
 _atom_type_scat_dispersion_real
 _atom_type_scat_dispersion_imag
 _atom_type_scat_source
 'C'  'C'   0.0033   0.0016
 'International Tables Vol C Tables 4.2.6.8 and 6.1.1.4'
 'H'  'H'   0.0000   0.0000
 'International Tables Vol C Tables 4.2.6.8 and 6.1.1.4'
 'N'  'N'   0.0061   0.0033
 'International Tables Vol C Tables 4.2.6.8 and 6.1.1.4'
 'O'  'O'   0.0106   0.0060
 'International Tables Vol C Tables 4.2.6.8 and 6.1.1.4'
 'F'  'F'   0.0171   0.0103
 'International Tables Vol C Tables 4.2.6.8 and 6.1.1.4'
 'Cl'  'Cl'   0.1484   0.1585
 'International Tables Vol C Tables 4.2.6.8 and 6.1.1.4'
 'Ru'  'Ru'  -1.2594   0.8363
 'International Tables Vol C Tables 4.2.6.8 and 6.1.1.4'
 'B'  'B'   0.0013   0.0007
 'International Tables Vol C Tables 4.2.6.8 and 6.1.1.4'
 
_symmetry_cell_setting            triclinic
_symmetry_space_group_name_H-M    P-1
 
loop_
 _symmetry_equiv_pos_as_xyz
 'x, y, z'
 '-x, -y, -z'
 
_cell_length_a                    8.6940(3)
_cell_length_b                    10.1720(4)
_cell_length_c                    13.9130(16)
_cell_angle_alpha                 94.744(2)
_cell_angle_beta                  90.465(2)
_cell_angle_gamma                 112.019(2)
_cell_volume                      1135.73(14)
_cell_formula_units_Z             2
_cell_measurement_temperature     100(2)
_cell_measurement_reflns_used     3749
_cell_measurement_theta_min       2.505
_cell_measurement_theta_max       23.866
 
_exptl_crystal_description        plate
_exptl_crystal_colour             yellow
_exptl_crystal_size_max           0.29
_exptl_crystal_size_mid           0.17
_exptl_crystal_size_min           0.02
_exptl_crystal_density_meas       ?
_exptl_crystal_density_diffrn     1.678
_exptl_crystal_density_method     'not measured'
_exptl_crystal_F_000              580
_exptl_absorpt_coefficient_mu     0.864
_exptl_absorpt_correction_type    multi-scan
_exptl_absorpt_correction_T_min   0.7878
_exptl_absorpt_correction_T_max   0.9829
_exptl_absorpt_process_details    SADABS
 
_exptl_special_details
;
 ?
;
 
_diffrn_ambient_temperature       100(2)
_diffrn_radiation_wavelength      0.71073
_diffrn_radiation_type            MoK\a
_diffrn_radiation_source          'fine-focus sealed tube'
_diffrn_radiation_monochromator   graphite
_diffrn_measurement_device_type   'CCD area detector'
_diffrn_measurement_method        'omega and phi scans'
_diffrn_detector_area_resol_mean  ?
_diffrn_standards_number          ?
_diffrn_standards_interval_count  ?
_diffrn_standards_interval_time   ?
_diffrn_standards_decay_%         ?
_diffrn_reflns_number             4475
_diffrn_reflns_av_R_equivalents   0.0000
_diffrn_reflns_av_sigmaI/netI     0.0597
_diffrn_reflns_limit_h_min        -10
_diffrn_reflns_limit_h_max        10
_diffrn_reflns_limit_k_min        -12
_diffrn_reflns_limit_k_max        12
_diffrn_reflns_limit_l_min        0
_diffrn_reflns_limit_l_max        17
_diffrn_reflns_theta_min          1.47
_diffrn_reflns_theta_max          26.02
_reflns_number_total              4475
_reflns_number_gt                 3571
_reflns_threshold_expression      >2sigma(I)
 
_computing_data_collection        ?
_computing_cell_refinement        ?
_computing_data_reduction         ?
_computing_structure_solution     ?
_computing_structure_refinement   'SHELXL-97 (Sheldrick, 1997)'
_computing_molecular_graphics     ?
_computing_publication_material   ?
 
_refine_special_details
;
 Refinement of F^2^ against ALL reflections.  The weighted R-factor wR and
 goodness of fit S are based on F^2^, conventional R-factors R are based
 on F, with F set to zero for negative F^2^. The threshold expression of
 F^2^ > 2sigma(F^2^) is used only for calculating R-factors(gt) etc. and is
 not relevant to the choice of reflections for refinement.  R-factors based
 on F^2^ are statistically about twice as large as those based on F, and R-
 factors based on ALL data will be even larger.
;
 
_refine_ls_structure_factor_coef  Fsqd
_refine_ls_matrix_type            full
_refine_ls_weighting_scheme       calc
_refine_ls_weighting_details
 'calc w=1/[\s^2^(Fo^2^)+(0.0606P)^2^+5.1413P] where P=(Fo^2^+2Fc^2^)/3'
_atom_sites_solution_primary      direct
_atom_sites_solution_secondary    difmap
_atom_sites_solution_hydrogens    geom
_refine_ls_hydrogen_treatment     constr
_refine_ls_extinction_method      none
_refine_ls_extinction_coef        ?
_refine_ls_number_reflns          4475
_refine_ls_number_parameters      303
_refine_ls_number_restraints      0
_refine_ls_R_factor_all           0.0573
_refine_ls_R_factor_gt            0.0373
_refine_ls_wR_factor_ref          0.1000
_refine_ls_wR_factor_gt           0.0845
_refine_ls_goodness_of_fit_ref    0.787
_refine_ls_restrained_S_all       0.787
_refine_ls_shift/su_max           0.014
_refine_ls_shift/su_mean          0.002
 
loop_
 _atom_site_label
 _atom_site_type_symbol
 _atom_site_fract_x
 _atom_site_fract_y
 _atom_site_fract_z
 _atom_site_U_iso_or_equiv
 _atom_site_adp_type
 _atom_site_occupancy
 _atom_site_symmetry_multiplicity
 _atom_site_calc_flag
 _atom_site_refinement_flags
 _atom_site_disorder_assembly
 _atom_site_disorder_group
Ru1 Ru 0.21108(4) 0.78538(3) 0.22907(2) 0.01170(11) Uani 1 1 d . . .
Cl1 Cl 0.11232(12) 0.80613(10) 0.38875(7) 0.0174(2) Uani 1 1 d . . .
N1 N 0.3818(4) 0.9922(3) 0.2648(2) 0.0126(7) Uani 1 1 d . . .
N2 N 0.3985(4) 0.7563(3) 0.3083(2) 0.0135(7) Uani 1 1 d . . .
O1 O 0.7107(4) 1.3974(3) 0.3525(2) 0.0199(6) Uani 1 1 d . . .
O2 O 0.7123(3) 0.7082(3) 0.5140(2) 0.0191(6) Uani 1 1 d . . .
C1 C 0.3646(5) 1.1100(4) 0.2365(3) 0.0150(8) Uani 1 1 d . . .
H1 H 0.2747 1.0990 0.1955 0.018 Uiso 1 1 calc R . .
C2 C 0.4735(5) 1.2443(4) 0.2655(3) 0.0151(8) Uani 1 1 d . . .
H2 H 0.4582 1.3230 0.2443 0.018 Uiso 1 1 calc R . .
C3 C 0.6084(5) 1.2623(4) 0.3275(3) 0.0143(8) Uani 1 1 d . . .
C4 C 0.6271(5) 1.1421(4) 0.3583(3) 0.0129(8) Uani 1 1 d . . .
H4 H 0.7153 1.1510 0.4001 0.015 Uiso 1 1 calc R . .
C5 C 0.5114(5) 1.0087(4) 0.3254(3) 0.0119(8) Uani 1 1 d . . .
C6 C 0.5170(5) 0.8736(4) 0.3538(3) 0.0129(8) Uani 1 1 d . . .
C7 C 0.6276(5) 0.8659(4) 0.4232(3) 0.0143(8) Uani 1 1 d . . .
H7 H 0.7077 0.9483 0.4536 0.017 Uiso 1 1 calc R . .
C8 C 0.6164(5) 0.7316(4) 0.4467(3) 0.0140(8) Uani 1 1 d . . .
C9 C 0.4935(5) 0.6113(4) 0.3997(3) 0.0149(8) Uani 1 1 d . . .
H9 H 0.4834 0.5208 0.4140 0.018 Uiso 1 1 calc R . .
C10 C 0.3872(5) 0.6274(4) 0.3318(3) 0.0168(8) Uani 1 1 d . . .
H10 H 0.3050 0.5465 0.3011 0.020 Uiso 1 1 calc R . .
C11 C 0.8506(5) 1.4220(4) 0.4177(3) 0.0236(10) Uani 1 1 d . . .
H11A H 0.8117 1.3813 0.4770 0.035 Uiso 1 1 calc R . .
H11B H 0.9115 1.5225 0.4308 0.035 Uiso 1 1 calc R . .
H11C H 0.9218 1.3784 0.3888 0.035 Uiso 1 1 calc R . .
C12 C 0.8417(5) 0.8298(4) 0.5636(3) 0.0173(9) Uani 1 1 d . . .
H12A H 0.9217 0.8777 0.5183 0.026 Uiso 1 1 calc R . .
H12B H 0.8953 0.7989 0.6126 0.026 Uiso 1 1 calc R . .
H12C H 0.7943 0.8940 0.5929 0.026 Uiso 1 1 calc R . .
C13 C 0.2511(5) 0.6990(4) 0.0857(3) 0.0147(8) Uani 1 1 d . . .
C14 C 0.1427(5) 0.5861(4) 0.1362(3) 0.0151(8) Uani 1 1 d . . .
H14 H 0.1690 0.5064 0.1419 0.018 Uiso 1 1 calc R . .
C15 C -0.0028(5) 0.5908(4) 0.1777(3) 0.0174(9) Uani 1 1 d . . .
H15 H -0.0698 0.5160 0.2111 0.021 Uiso 1 1 calc R . .
C16 C -0.0467(5) 0.7116(4) 0.1680(3) 0.0162(8) Uani 1 1 d . . .
C17 C 0.0551(5) 0.8216(4) 0.1161(3) 0.0158(8) Uani 1 1 d . . .
H17 H 0.0256 0.8988 0.1070 0.019 Uiso 1 1 calc R . .
C18 C 0.2031(5) 0.8159(4) 0.0773(3) 0.0157(8) Uani 1 1 d . . .
H18 H 0.2709 0.8918 0.0451 0.019 Uiso 1 1 calc R . .
C19 C -0.1949(5) 0.7210(5) 0.2170(3) 0.0229(9) Uani 1 1 d . . .
H19A H -0.1814 0.8191 0.2289 0.034 Uiso 1 1 calc R . .
H19B H -0.2058 0.6792 0.2772 0.034 Uiso 1 1 calc R . .
H19C H -0.2927 0.6707 0.1765 0.034 Uiso 1 1 calc R . .
C20 C 0.4089(5) 0.6896(4) 0.0495(3) 0.0180(9) Uani 1 1 d . . .
H20 H 0.4534 0.6478 0.0983 0.022 Uiso 1 1 calc R . .
C21 C 0.3679(5) 0.5874(5) -0.0428(3) 0.0224(9) Uani 1 1 d . . .
H21A H 0.2876 0.4965 -0.0296 0.034 Uiso 1 1 calc R . .
H21B H 0.4672 0.5761 -0.0644 0.034 Uiso 1 1 calc R . .
H21C H 0.3234 0.6255 -0.0920 0.034 Uiso 1 1 calc R . .
C22 C 0.5439(5) 0.8333(5) 0.0320(3) 0.0256(10) Uani 1 1 d . . .
H22A H 0.5068 0.8737 -0.0191 0.038 Uiso 1 1 calc R . .
H22B H 0.6436 0.8195 0.0142 0.038 Uiso 1 1 calc R . .
H22C H 0.5658 0.8967 0.0899 0.038 Uiso 1 1 calc R . .
F1 F 1.0800(5) 0.1837(5) 0.1049(2) 0.0764(13) Uani 1 1 d . . .
F2 F 1.0844(5) 0.3149(3) 0.2443(2) 0.0583(11) Uani 1 1 d . . .
F3 F 0.9321(4) 0.0809(3) 0.2282(2) 0.0466(8) Uani 1 1 d . . .
F4 F 0.8564(4) 0.2320(3) 0.1451(2) 0.0427(8) Uani 1 1 d . . .
B1 B 0.9875(7) 0.2029(6) 0.1795(4) 0.0252(11) Uani 1 1 d . . .
 
loop_
 _atom_site_aniso_label
 _atom_site_aniso_U_11
 _atom_site_aniso_U_22
 _atom_site_aniso_U_33
 _atom_site_aniso_U_23
 _atom_site_aniso_U_13
 _atom_site_aniso_U_12
Ru1 0.01297(17) 0.00842(17) 0.01200(16) 0.00042(11) -0.00002(11) 0.00218(12)
Cl1 0.0200(5) 0.0147(5) 0.0150(5) 0.0010(4) 0.0039(4) 0.0038(4)
N1 0.0156(17) 0.0112(16) 0.0109(15) 0.0031(12) 0.0012(13) 0.0045(14)
N2 0.0165(17) 0.0060(16) 0.0160(16) 0.0019(12) 0.0018(13) 0.0016(13)
O1 0.0197(16) 0.0081(14) 0.0277(16) 0.0005(11) -0.0078(12) 0.0008(12)
O2 0.0192(15) 0.0163(15) 0.0207(15) 0.0048(11) -0.0039(12) 0.0047(12)
C1 0.018(2) 0.013(2) 0.0152(19) 0.0012(15) 0.0002(16) 0.0073(17)
C2 0.023(2) 0.0103(19) 0.0138(19) 0.0040(15) 0.0025(16) 0.0074(17)
C3 0.015(2) 0.0097(19) 0.0170(19) 0.0010(15) 0.0019(16) 0.0027(16)
C4 0.0112(19) 0.0129(19) 0.0129(18) 0.0002(14) -0.0015(15) 0.0028(16)
C5 0.014(2) 0.0083(18) 0.0114(18) 0.0032(14) 0.0041(15) 0.0016(15)
C6 0.016(2) 0.0081(18) 0.0135(19) 0.0021(14) 0.0023(15) 0.0032(16)
C7 0.013(2) 0.0089(19) 0.018(2) 0.0006(15) 0.0012(16) 0.0005(16)
C8 0.016(2) 0.016(2) 0.0120(18) 0.0048(15) 0.0020(15) 0.0073(17)
C9 0.016(2) 0.0082(19) 0.021(2) 0.0049(15) -0.0006(16) 0.0042(16)
C10 0.019(2) 0.013(2) 0.017(2) 0.0015(15) 0.0035(16) 0.0042(17)
C11 0.023(2) 0.013(2) 0.030(2) -0.0002(17) -0.0065(19) 0.0014(18)
C12 0.021(2) 0.015(2) 0.0146(19) 0.0008(15) -0.0019(16) 0.0043(17)
C13 0.017(2) 0.016(2) 0.0097(18) -0.0035(14) -0.0026(15) 0.0055(17)
C14 0.017(2) 0.0112(19) 0.0157(19) -0.0025(15) -0.0039(16) 0.0045(16)
C15 0.017(2) 0.012(2) 0.018(2) -0.0014(15) -0.0051(16) -0.0002(17)
C16 0.014(2) 0.019(2) 0.0120(19) -0.0052(15) -0.0063(15) 0.0034(17)
C17 0.015(2) 0.018(2) 0.0154(19) 0.0002(15) -0.0041(16) 0.0071(17)
C18 0.019(2) 0.013(2) 0.0144(19) 0.0019(15) 0.0001(16) 0.0059(17)
C19 0.017(2) 0.023(2) 0.027(2) -0.0035(18) -0.0001(18) 0.0074(19)
C20 0.020(2) 0.019(2) 0.017(2) -0.0004(16) 0.0003(17) 0.0095(18)
C21 0.022(2) 0.024(2) 0.023(2) -0.0031(18) 0.0028(18) 0.0122(19)
C22 0.018(2) 0.023(2) 0.032(2) 0.0032(19) 0.0061(19) 0.0024(19)
F1 0.089(3) 0.148(4) 0.0374(19) 0.019(2) 0.0165(19) 0.094(3)
F2 0.090(3) 0.0193(15) 0.0455(19) 0.0087(13) -0.0381(18) -0.0030(16)
F3 0.056(2) 0.0178(15) 0.060(2) 0.0069(13) -0.0190(16) 0.0069(14)
F4 0.0464(19) 0.055(2) 0.0410(17) 0.0087(14) -0.0046(14) 0.0346(16)
B1 0.031(3) 0.028(3) 0.019(2) 0.000(2) -0.005(2) 0.015(2)
 
_geom_special_details
;
 All esds (except the esd in the dihedral angle between two l.s. planes)
 are estimated using the full covariance matrix.  The cell esds are taken
 into account individually in the estimation of esds in distances, angles
 and torsion angles; correlations between esds in cell parameters are only
 used when they are defined by crystal symmetry.  An approximate (isotropic)
 treatment of cell esds is used for estimating esds involving l.s. planes.
;
 
loop_
 _geom_bond_atom_site_label_1
 _geom_bond_atom_site_label_2
 _geom_bond_distance
 _geom_bond_site_symmetry_2
 _geom_bond_publ_flag
Ru1 N2 2.084(3) . ?
Ru1 N1 2.085(3) . ?
Ru1 C18 2.164(4) . ?
Ru1 C14 2.187(4) . ?
Ru1 C13 2.196(4) . ?
Ru1 C15 2.207(4) . ?
Ru1 C16 2.216(4) . ?
Ru1 C17 2.210(4) . ?
Ru1 Cl1 2.4097(10) . ?
N1 C5 1.352(5) . ?
N1 C1 1.351(5) . ?
N2 C6 1.352(5) . ?
N2 C10 1.345(5) . ?
O1 C3 1.341(5) . ?
O1 C11 1.443(5) . ?
O2 C8 1.342(5) . ?
O2 C12 1.441(5) . ?
C1 C2 1.363(5) . ?
C2 C3 1.396(5) . ?
C3 C4 1.393(5) . ?
C4 C5 1.389(5) . ?
C5 C6 1.480(5) . ?
C6 C7 1.385(5) . ?
C7 C8 1.399(5) . ?
C8 C9 1.394(5) . ?
C9 C10 1.378(6) . ?
C13 C18 1.412(5) . ?
C13 C14 1.426(6) . ?
C13 C20 1.499(6) . ?
C14 C15 1.411(6) . ?
C15 C16 1.432(6) . ?
C16 C17 1.399(6) . ?
C16 C19 1.493(6) . ?
C17 C18 1.419(6) . ?
C20 C21 1.533(5) . ?
C20 C22 1.533(6) . ?
F1 B1 1.363(6) . ?
F2 B1 1.386(6) . ?
F3 B1 1.389(6) . ?
F4 B1 1.372(6) . ?
 
loop_
 _geom_angle_atom_site_label_1
 _geom_angle_atom_site_label_2
 _geom_angle_atom_site_label_3
 _geom_angle
 _geom_angle_site_symmetry_1
 _geom_angle_site_symmetry_3
 _geom_angle_publ_flag
N2 Ru1 N1 76.37(12) . . ?
N2 Ru1 C18 128.09(14) . . ?
N1 Ru1 C18 93.04(13) . . ?
N2 Ru1 C14 95.61(13) . . ?
N1 Ru1 C14 147.96(14) . . ?
C18 Ru1 C14 67.29(14) . . ?
N2 Ru1 C13 99.35(13) . . ?
N1 Ru1 C13 111.84(14) . . ?
C18 Ru1 C13 37.79(14) . . ?
C14 Ru1 C13 37.96(15) . . ?
N2 Ru1 C15 116.35(14) . . ?
N1 Ru1 C15 167.23(13) . . ?
C18 Ru1 C15 79.98(15) . . ?
C14 Ru1 C15 37.45(15) . . ?
C13 Ru1 C15 68.74(15) . . ?
N2 Ru1 C16 151.99(14) . . ?
N1 Ru1 C16 129.57(14) . . ?
C18 Ru1 C16 67.82(15) . . ?
C14 Ru1 C16 67.82(15) . . ?
C13 Ru1 C16 81.56(14) . . ?
C15 Ru1 C16 37.79(15) . . ?
N2 Ru1 C17 165.91(13) . . ?
N1 Ru1 C17 100.91(13) . . ?
C18 Ru1 C17 37.84(15) . . ?
C14 Ru1 C17 79.31(15) . . ?
C13 Ru1 C17 68.55(14) . . ?
C15 Ru1 C17 67.06(15) . . ?
C16 Ru1 C17 36.87(15) . . ?
N2 Ru1 Cl1 81.09(9) . . ?
N1 Ru1 Cl1 85.25(9) . . ?
C18 Ru1 Cl1 149.54(11) . . ?
C14 Ru1 Cl1 124.67(11) . . ?
C13 Ru1 Cl1 162.61(11) . . ?
C15 Ru1 Cl1 95.34(11) . . ?
C16 Ru1 Cl1 89.98(10) . . ?
C17 Ru1 Cl1 112.66(11) . . ?
C5 N1 C1 118.4(3) . . ?
C5 N1 Ru1 117.3(2) . . ?
C1 N1 Ru1 124.1(3) . . ?
C6 N2 C10 118.7(3) . . ?
C6 N2 Ru1 117.4(2) . . ?
C10 N2 Ru1 122.4(3) . . ?
C3 O1 C11 118.1(3) . . ?
C8 O2 C12 118.0(3) . . ?
N1 C1 C2 122.7(4) . . ?
C1 C2 C3 119.3(4) . . ?
O1 C3 C4 125.3(4) . . ?
O1 C3 C2 115.9(3) . . ?
C4 C3 C2 118.8(3) . . ?
C3 C4 C5 118.6(4) . . ?
N1 C5 C4 122.2(3) . . ?
N1 C5 C6 114.2(3) . . ?
C4 C5 C6 123.6(4) . . ?
N2 C6 C7 122.5(3) . . ?
N2 C6 C5 113.6(3) . . ?
C7 C6 C5 123.9(3) . . ?
C6 C7 C8 118.6(3) . . ?
O2 C8 C9 116.3(3) . . ?
O2 C8 C7 125.1(4) . . ?
C9 C8 C7 118.5(3) . . ?
C10 C9 C8 119.6(4) . . ?
N2 C10 C9 122.1(4) . . ?
C18 C13 C14 116.3(4) . . ?
C18 C13 C20 124.7(4) . . ?
C14 C13 C20 118.9(3) . . ?
C18 C13 Ru1 69.9(2) . . ?
C14 C13 Ru1 70.7(2) . . ?
C20 C13 Ru1 127.5(3) . . ?
C15 C14 C13 122.4(4) . . ?
C15 C14 Ru1 72.0(2) . . ?
C13 C14 Ru1 71.3(2) . . ?
C14 C15 C16 119.6(4) . . ?
C14 C15 Ru1 70.5(2) . . ?
C16 C15 Ru1 71.5(2) . . ?
C17 C16 C15 119.0(4) . . ?
C17 C16 C19 121.4(4) . . ?
C15 C16 C19 119.6(4) . . ?
C17 C16 Ru1 71.3(2) . . ?
C15 C16 Ru1 70.8(2) . . ?
C19 C16 Ru1 127.3(3) . . ?
C16 C17 C18 120.3(4) . . ?
C16 C17 Ru1 71.8(2) . . ?
C18 C17 Ru1 69.3(2) . . ?
C13 C18 C17 122.4(4) . . ?
C13 C18 Ru1 72.3(2) . . ?
C17 C18 Ru1 72.8(2) . . ?
C13 C20 C21 108.8(3) . . ?
C13 C20 C22 114.4(3) . . ?
C21 C20 C22 110.6(3) . . ?
F1 B1 F4 110.0(4) . . ?
F1 B1 F2 110.1(5) . . ?
F4 B1 F2 109.2(4) . . ?
F1 B1 F3 108.9(4) . . ?
F4 B1 F3 110.9(4) . . ?
F2 B1 F3 107.6(4) . . ?
 
_diffrn_measured_fraction_theta_max    0.998
_diffrn_reflns_theta_full              26.02
_diffrn_measured_fraction_theta_full   0.998
_refine_diff_density_max    0.493
_refine_diff_density_min   -0.878
_refine_diff_density_rms    0.111

#===END

 
data_2PF6
 
_audit_creation_method            SHELXL-97
_chemical_name_systematic
;
 ?
;
_chemical_name_common             ?
_chemical_melting_point           ?
_chemical_formula_moiety          
 'C22 H26 Cl N2 O2 Ru, F6 P'
_chemical_formula_sum
 'C22 H26 Cl F6 N2 O2 P Ru'
_chemical_formula_weight          631.94
 
loop_
 _atom_type_symbol
 _atom_type_description
 _atom_type_scat_dispersion_real
 _atom_type_scat_dispersion_imag
 _atom_type_scat_source
 'C'  'C'   0.0033   0.0016
 'International Tables Vol C Tables 4.2.6.8 and 6.1.1.4'
 'H'  'H'   0.0000   0.0000
 'International Tables Vol C Tables 4.2.6.8 and 6.1.1.4'
 'N'  'N'   0.0061   0.0033
 'International Tables Vol C Tables 4.2.6.8 and 6.1.1.4'
 'O'  'O'   0.0106   0.0060
 'International Tables Vol C Tables 4.2.6.8 and 6.1.1.4'
 'F'  'F'   0.0171   0.0103
 'International Tables Vol C Tables 4.2.6.8 and 6.1.1.4'
 'P'  'P'   0.1023   0.0942
 'International Tables Vol C Tables 4.2.6.8 and 6.1.1.4'
 'Cl'  'Cl'   0.1484   0.1585
 'International Tables Vol C Tables 4.2.6.8 and 6.1.1.4'
 'Ru'  'Ru'  -1.2594   0.8363
 'International Tables Vol C Tables 4.2.6.8 and 6.1.1.4'
 
_symmetry_cell_setting            triclinic
_symmetry_space_group_name_H-M    P-1
 
loop_
 _symmetry_equiv_pos_as_xyz
 'x, y, z'
 '-x, -y, -z'
 
_cell_length_a                    8.4049(17)
_cell_length_b                    10.630(2)
_cell_length_c                    14.887(3)
_cell_angle_alpha                 102.336(3)
_cell_angle_beta                  90.605(3)
_cell_angle_gamma                 109.219(3)
_cell_volume                      1222.2(4)
_cell_formula_units_Z             2
_cell_measurement_temperature     100(2)
_cell_measurement_reflns_used     4124
_cell_measurement_theta_min       2.230
_cell_measurement_theta_max       23.526
 
_exptl_crystal_description        prism
_exptl_crystal_colour             yellow
_exptl_crystal_size_max           0.20
_exptl_crystal_size_mid           0.10
_exptl_crystal_size_min           0.10
_exptl_crystal_density_meas       ?
_exptl_crystal_density_diffrn     1.717
_exptl_crystal_density_method     'not measured'
_exptl_crystal_F_000              636
_exptl_absorpt_coefficient_mu     0.885
_exptl_absorpt_correction_type    multi-scan
_exptl_absorpt_correction_T_min   0.8428
_exptl_absorpt_correction_T_max   0.9167
_exptl_absorpt_process_details    SADABS
 
_exptl_special_details
;
 ?
;
 
_diffrn_ambient_temperature       100(2)
_diffrn_radiation_wavelength      0.71073
_diffrn_radiation_type            MoK\a
_diffrn_radiation_source          'fine-focus sealed tube'
_diffrn_radiation_monochromator   graphite
_diffrn_measurement_device_type   'CCD area detector'
_diffrn_measurement_method        'omega and phi scans'
_diffrn_detector_area_resol_mean  ?
_diffrn_standards_number          ?
_diffrn_standards_interval_count  ?
_diffrn_standards_interval_time   ?
_diffrn_standards_decay_%         ?
_diffrn_reflns_number             12047
_diffrn_reflns_av_R_equivalents   0.0373
_diffrn_reflns_av_sigmaI/netI     0.0462
_diffrn_reflns_limit_h_min        -9
_diffrn_reflns_limit_h_max        9
_diffrn_reflns_limit_k_min        -12
_diffrn_reflns_limit_k_max        12
_diffrn_reflns_limit_l_min        -17
_diffrn_reflns_limit_l_max        17
_diffrn_reflns_theta_min          1.41
_diffrn_reflns_theta_max          25.00
_reflns_number_total              4280
_reflns_number_gt                 3568
_reflns_threshold_expression      >2sigma(I)
 
_computing_data_collection        ?
_computing_cell_refinement        ?
_computing_data_reduction         ?
_computing_structure_solution     ?
_computing_structure_refinement   'SHELXL-97 (Sheldrick, 1997)'
_computing_molecular_graphics     ?
_computing_publication_material   ?
 
_refine_special_details
;
 Refinement of F^2^ against ALL reflections.  The weighted R-factor wR and
 goodness of fit S are based on F^2^, conventional R-factors R are based
 on F, with F set to zero for negative F^2^. The threshold expression of
 F^2^ > 2sigma(F^2^) is used only for calculating R-factors(gt) etc. and is
 not relevant to the choice of reflections for refinement.  R-factors based
 on F^2^ are statistically about twice as large as those based on F, and R-
 factors based on ALL data will be even larger.
;
 
_refine_ls_structure_factor_coef  Fsqd
_refine_ls_matrix_type            full
_refine_ls_weighting_scheme       calc
_refine_ls_weighting_details
 'calc w=1/[\s^2^(Fo^2^)+(0.0466P)^2^+0.0000P] where P=(Fo^2^+2Fc^2^)/3'
_atom_sites_solution_primary      direct
_atom_sites_solution_secondary    difmap
_atom_sites_solution_hydrogens    geom
_refine_ls_hydrogen_treatment     constr
_refine_ls_extinction_method      none
_refine_ls_extinction_coef        ?
_refine_ls_number_reflns          4280
_refine_ls_number_parameters      321
_refine_ls_number_restraints      0
_refine_ls_R_factor_all           0.0483
_refine_ls_R_factor_gt            0.0395
_refine_ls_wR_factor_ref          0.0958
_refine_ls_wR_factor_gt           0.0931
_refine_ls_goodness_of_fit_ref    1.068
_refine_ls_restrained_S_all       1.068
_refine_ls_shift/su_max           0.001
_refine_ls_shift/su_mean          0.000
 
loop_
 _atom_site_label
 _atom_site_type_symbol
 _atom_site_fract_x
 _atom_site_fract_y
 _atom_site_fract_z
 _atom_site_U_iso_or_equiv
 _atom_site_adp_type
 _atom_site_occupancy
 _atom_site_symmetry_multiplicity
 _atom_site_calc_flag
 _atom_site_refinement_flags
 _atom_site_disorder_assembly
 _atom_site_disorder_group
Ru1 Ru 0.57909(4) 0.79144(3) 0.73287(2) 0.04134(13) Uani 1 1 d . A .
P1 P 0.14675(16) 0.22004(12) 0.66387(8) 0.0642(3) Uani 1 1 d . . .
Cl1 Cl 0.74528(14) 0.83643(11) 0.87498(7) 0.0595(3) Uani 1 1 d . . .
N1 N 0.5589(4) 0.9827(3) 0.78699(19) 0.0402(7) Uani 1 1 d . . .
N2 N 0.3771(4) 0.7496(3) 0.8154(2) 0.0417(7) Uani 1 1 d . . .
O1 O 0.5210(4) 1.3496(2) 0.92194(19) 0.0563(7) Uani 1 1 d . . .
O2 O 0.0261(3) 0.6845(3) 1.00597(18) 0.0562(7) Uani 1 1 d . . .
C1 C 0.6601(5) 1.1003(4) 0.7694(3) 0.0471(10) Uani 1 1 d . . .
H1 H 0.7398 1.0960 0.7270 0.057 Uiso 1 1 calc R . .
C2 C 0.6527(5) 1.2255(4) 0.8100(3) 0.0463(10) Uani 1 1 d . . .
H2 H 0.7228 1.3040 0.7939 0.056 Uiso 1 1 calc R . .
C3 C 0.5401(5) 1.2342(4) 0.8752(2) 0.0417(9) Uani 1 1 d . . .
C4 C 0.4368(4) 1.1130(3) 0.8964(2) 0.0407(9) Uani 1 1 d . . .
H4 H 0.3602 1.1156 0.9408 0.049 Uiso 1 1 calc R . .
C5 C 0.4492(4) 0.9910(3) 0.8514(2) 0.0368(8) Uani 1 1 d . . .
C6 C 0.3457(4) 0.8571(3) 0.8681(2) 0.0382(8) Uani 1 1 d . . .
C7 C 0.2296(4) 0.8430(4) 0.9328(2) 0.0399(9) Uani 1 1 d . . .
H7 H 0.2109 0.9194 0.9682 0.048 Uiso 1 1 calc R . .
C8 C 0.1405(4) 0.7131(4) 0.9445(2) 0.0429(9) Uani 1 1 d . . .
C9 C 0.1727(5) 0.6032(4) 0.8902(3) 0.0515(10) Uani 1 1 d . . .
H9 H 0.1151 0.5149 0.8966 0.062 Uiso 1 1 calc R . .
C10 C 0.2883(5) 0.6242(4) 0.8276(3) 0.0530(10) Uani 1 1 d . . .
H10 H 0.3075 0.5487 0.7913 0.064 Uiso 1 1 calc R . .
C11 C 0.6222(6) 1.4750(4) 0.9008(3) 0.0671(13) Uani 1 1 d . . .
H11A H 0.7397 1.4880 0.9127 0.101 Uiso 1 1 calc R . .
H11B H 0.5961 1.5497 0.9385 0.101 Uiso 1 1 calc R . .
H11C H 0.5989 1.4715 0.8369 0.101 Uiso 1 1 calc R . .
C12 C -0.0200(5) 0.7938(4) 1.0602(3) 0.0569(11) Uani 1 1 d . . .
H12A H 0.0776 0.8596 1.0979 0.085 Uiso 1 1 calc R . .
H12B H -0.1057 0.7577 1.0990 0.085 Uiso 1 1 calc R . .
H12C H -0.0628 0.8372 1.0201 0.085 Uiso 1 1 calc R . .
C13 C 0.4858(6) 0.7536(5) 0.5879(3) 0.0610(12) Uani 1 1 d . . .
C14 C 0.6576(6) 0.8371(4) 0.6017(3) 0.0613(12) Uani 1 1 d . A .
H14 H 0.6891 0.9206 0.5847 0.074 Uiso 1 1 calc R . .
C15 C 0.7814(6) 0.7996(5) 0.6396(3) 0.0617(12) Uani 1 1 d . . .
H15 H 0.8933 0.8579 0.6479 0.074 Uiso 1 1 calc R A .
C16 C 0.7390(6) 0.6746(5) 0.6655(3) 0.0608(12) Uani 1 1 d . A .
C17 C 0.5712(6) 0.5902(4) 0.6527(3) 0.0600(12) Uani 1 1 d . . .
H17 H 0.5414 0.5057 0.6683 0.072 Uiso 1 1 calc R A .
C18 C 0.4462(6) 0.6299(5) 0.6169(3) 0.0606(12) Uani 1 1 d . A .
H18 H 0.3339 0.5734 0.6121 0.073 Uiso 1 1 calc R . .
C19 C 0.8748(7) 0.6377(6) 0.7096(4) 0.1001(19) Uani 1 1 d . . .
H19A H 0.9117 0.5771 0.6639 0.150 Uiso 1 1 calc R A .
H19B H 0.8302 0.5931 0.7581 0.150 Uiso 1 1 calc R . .
H19C H 0.9688 0.7193 0.7347 0.150 Uiso 1 1 calc R . .
C20 C 0.3548(8) 0.7965(8) 0.5457(4) 0.108(2) Uani 1 1 d . A 1
H20 H 0.4196 0.8922 0.5466 0.130 Uiso 1 1 calc R A 1
C21 C 0.3296(9) 0.7329(9) 0.4422(4) 0.158(4) Uani 1 1 d . A 1
H21A H 0.2693 0.6363 0.4317 0.238 Uiso 1 1 calc R A 1
H21B H 0.4378 0.7477 0.4177 0.238 Uiso 1 1 calc R A 1
H21C H 0.2658 0.7745 0.4120 0.238 Uiso 1 1 calc R A 1
C22 C 0.2303(11) 0.8093(12) 0.5870(5) 0.224(6) Uani 1 1 d . A 1
H22A H 0.1402 0.7226 0.5747 0.336 Uiso 1 1 calc R A 1
H22B H 0.1930 0.8750 0.5658 0.336 Uiso 1 1 calc R A 1
H22C H 0.2621 0.8403 0.6522 0.336 Uiso 1 1 calc R A 1
F1 F 0.2415(5) 0.1436(4) 0.5993(3) 0.1560(17) Uani 1 1 d . B 1
F2 F 0.0466(4) 0.2962(4) 0.7297(3) 0.1317(14) Uani 1 1 d . B 1
F3 F 0.1708(5) 0.3268(4) 0.6045(3) 0.1468(16) Uani 1 1 d . B 1
F4 F 0.3107(4) 0.3154(3) 0.7260(3) 0.1223(13) Uani 1 1 d . B 1
F5 F 0.1186(5) 0.1139(3) 0.7251(2) 0.1220(13) Uani 1 1 d . B 1
F6 F -0.0231(4) 0.1275(4) 0.6061(3) 0.1344(14) Uani 1 1 d . B 1
 
loop_
 _atom_site_aniso_label
 _atom_site_aniso_U_11
 _atom_site_aniso_U_22
 _atom_site_aniso_U_33
 _atom_site_aniso_U_23
 _atom_site_aniso_U_13
 _atom_site_aniso_U_12
Ru1 0.0447(2) 0.0380(2) 0.0378(2) 0.00666(13) 0.01257(14) 0.01054(14)
P1 0.0616(8) 0.0568(7) 0.0570(7) 0.0076(6) 0.0109(6) 0.0006(6)
Cl1 0.0650(7) 0.0660(7) 0.0481(6) 0.0095(5) 0.0019(5) 0.0253(6)
N1 0.0419(18) 0.0390(17) 0.0373(17) 0.0101(14) 0.0095(14) 0.0095(14)
N2 0.0463(19) 0.0363(17) 0.0401(18) 0.0088(14) 0.0135(14) 0.0107(15)
O1 0.0699(19) 0.0342(15) 0.0630(18) 0.0099(13) 0.0199(15) 0.0156(14)
O2 0.0557(17) 0.0510(16) 0.0559(17) 0.0172(14) 0.0237(14) 0.0068(14)
C1 0.049(2) 0.045(2) 0.046(2) 0.0149(19) 0.0178(19) 0.0116(19)
C2 0.049(2) 0.037(2) 0.047(2) 0.0135(18) 0.0125(19) 0.0054(18)
C3 0.048(2) 0.036(2) 0.039(2) 0.0081(17) 0.0034(18) 0.0118(18)
C4 0.043(2) 0.040(2) 0.039(2) 0.0091(17) 0.0122(17) 0.0130(17)
C5 0.037(2) 0.036(2) 0.0328(19) 0.0069(16) 0.0042(16) 0.0066(16)
C6 0.036(2) 0.037(2) 0.039(2) 0.0109(16) 0.0051(16) 0.0069(16)
C7 0.040(2) 0.038(2) 0.039(2) 0.0082(17) 0.0099(17) 0.0090(17)
C8 0.036(2) 0.046(2) 0.041(2) 0.0118(18) 0.0068(17) 0.0044(18)
C9 0.054(3) 0.037(2) 0.057(3) 0.0143(19) 0.013(2) 0.0036(19)
C10 0.060(3) 0.042(2) 0.053(3) 0.0106(19) 0.015(2) 0.011(2)
C11 0.080(3) 0.035(2) 0.080(3) 0.013(2) 0.023(3) 0.010(2)
C12 0.054(3) 0.067(3) 0.047(2) 0.015(2) 0.019(2) 0.016(2)
C13 0.074(3) 0.077(3) 0.033(2) -0.002(2) 0.002(2) 0.037(3)
C14 0.090(4) 0.050(3) 0.036(2) 0.0072(19) 0.024(2) 0.015(3)
C15 0.056(3) 0.070(3) 0.050(3) 0.000(2) 0.024(2) 0.019(2)
C16 0.070(3) 0.058(3) 0.055(3) 0.006(2) 0.023(2) 0.026(3)
C17 0.080(3) 0.047(2) 0.050(3) 0.003(2) 0.024(2) 0.021(2)
C18 0.056(3) 0.060(3) 0.045(3) -0.010(2) 0.011(2) 0.007(2)
C19 0.095(4) 0.131(5) 0.103(4) 0.021(4) 0.025(3) 0.079(4)
C20 0.106(5) 0.187(7) 0.053(3) 0.008(4) 0.010(3) 0.090(5)
C21 0.165(7) 0.276(11) 0.071(4) -0.002(5) -0.014(4) 0.151(8)
C22 0.217(10) 0.460(18) 0.103(6) 0.052(8) 0.030(6) 0.266(12)
F1 0.173(4) 0.151(3) 0.141(3) 0.009(3) 0.083(3) 0.065(3)
F2 0.122(3) 0.122(3) 0.151(4) 0.007(3) 0.046(3) 0.055(2)
F3 0.155(3) 0.120(3) 0.145(3) 0.085(3) -0.002(3) -0.013(2)
F4 0.091(2) 0.087(2) 0.154(3) 0.002(2) -0.042(2) 0.0036(18)
F5 0.182(4) 0.078(2) 0.091(2) 0.0307(18) 0.016(2) 0.017(2)
F6 0.112(3) 0.105(3) 0.138(3) 0.013(2) -0.040(2) -0.015(2)
 
_geom_special_details
;
 All esds (except the esd in the dihedral angle between two l.s. planes)
 are estimated using the full covariance matrix.  The cell esds are taken
 into account individually in the estimation of esds in distances, angles
 and torsion angles; correlations between esds in cell parameters are only
 used when they are defined by crystal symmetry.  An approximate (isotropic)
 treatment of cell esds is used for estimating esds involving l.s. planes.
;
 
loop_
 _geom_bond_atom_site_label_1
 _geom_bond_atom_site_label_2
 _geom_bond_distance
 _geom_bond_site_symmetry_2
 _geom_bond_publ_flag
Ru1 N1 2.084(3) . ?
Ru1 N2 2.091(3) . ?
Ru1 C18 2.146(4) . ?
Ru1 C14 2.169(4) . ?
Ru1 C17 2.195(4) . ?
Ru1 C13 2.196(4) . ?
Ru1 C15 2.198(4) . ?
Ru1 C16 2.225(4) . ?
Ru1 Cl1 2.3919(11) . ?
P1 F1 1.525(4) . ?
P1 F3 1.547(3) . ?
P1 F5 1.559(3) . ?
P1 F6 1.560(3) . ?
P1 F4 1.561(3) . ?
P1 F2 1.566(3) . ?
N1 C1 1.341(5) . ?
N1 C5 1.347(4) . ?
N2 C6 1.346(4) . ?
N2 C10 1.348(5) . ?
O1 C3 1.335(4) . ?
O1 C11 1.428(4) . ?
O2 C8 1.342(4) . ?
O2 C12 1.433(4) . ?
C1 C2 1.362(5) . ?
C2 C3 1.373(5) . ?
C3 C4 1.398(5) . ?
C4 C5 1.364(5) . ?
C5 C6 1.478(5) . ?
C6 C7 1.374(5) . ?
C7 C8 1.386(5) . ?
C8 C9 1.379(5) . ?
C9 C10 1.351(5) . ?
C13 C18 1.409(6) . ?
C13 C14 1.410(6) . ?
C13 C20 1.501(7) . ?
C14 C15 1.384(6) . ?
C15 C16 1.397(6) . ?
C16 C17 1.385(6) . ?
C16 C19 1.509(7) . ?
C17 C18 1.393(6) . ?
C20 C22 1.250(8) . ?
C20 C21 1.527(7) . ?
 
loop_
 _geom_angle_atom_site_label_1
 _geom_angle_atom_site_label_2
 _geom_angle_atom_site_label_3
 _geom_angle
 _geom_angle_site_symmetry_1
 _geom_angle_site_symmetry_3
 _geom_angle_publ_flag
N1 Ru1 N2 76.13(11) . . ?
N1 Ru1 C18 131.95(16) . . ?
N2 Ru1 C18 94.01(14) . . ?
N1 Ru1 C14 94.55(14) . . ?
N2 Ru1 C14 145.21(17) . . ?
C18 Ru1 C14 67.20(16) . . ?
N1 Ru1 C17 168.98(15) . . ?
N2 Ru1 C17 104.88(14) . . ?
C18 Ru1 C17 37.42(16) . . ?
C14 Ru1 C17 78.34(16) . . ?
N1 Ru1 C13 101.49(14) . . ?
N2 Ru1 C13 110.53(15) . . ?
C18 Ru1 C13 37.85(17) . . ?
C14 Ru1 C13 37.67(16) . . ?
C17 Ru1 C13 67.74(17) . . ?
N1 Ru1 C15 113.04(15) . . ?
N2 Ru1 C15 170.79(14) . . ?
C18 Ru1 C15 79.25(16) . . ?
C14 Ru1 C15 36.94(16) . . ?
C17 Ru1 C15 65.97(16) . . ?
C13 Ru1 C15 67.78(17) . . ?
N1 Ru1 C16 147.13(16) . . ?
N2 Ru1 C16 134.57(15) . . ?
C18 Ru1 C16 67.16(17) . . ?
C14 Ru1 C16 66.56(17) . . ?
C17 Ru1 C16 36.53(16) . . ?
C13 Ru1 C16 80.20(16) . . ?
C15 Ru1 C16 36.81(16) . . ?
N1 Ru1 Cl1 83.99(8) . . ?
N2 Ru1 Cl1 83.32(9) . . ?
C18 Ru1 Cl1 142.36(14) . . ?
C14 Ru1 Cl1 129.64(14) . . ?
C17 Ru1 Cl1 107.03(13) . . ?
C13 Ru1 Cl1 165.91(12) . . ?
C15 Ru1 Cl1 98.14(13) . . ?
C16 Ru1 Cl1 88.18(13) . . ?
F1 P1 F3 91.6(3) . . ?
F1 P1 F5 90.0(2) . . ?
F3 P1 F5 178.4(2) . . ?
F1 P1 F6 89.9(2) . . ?
F3 P1 F6 90.8(2) . . ?
F5 P1 F6 88.8(2) . . ?
F1 P1 F4 93.3(2) . . ?
F3 P1 F4 89.8(2) . . ?
F5 P1 F4 90.5(2) . . ?
F6 P1 F4 176.7(2) . . ?
F1 P1 F2 179.0(2) . . ?
F3 P1 F2 88.8(2) . . ?
F5 P1 F2 89.6(2) . . ?
F6 P1 F2 89.2(2) . . ?
F4 P1 F2 87.6(2) . . ?
C1 N1 C5 117.5(3) . . ?
C1 N1 Ru1 124.4(2) . . ?
C5 N1 Ru1 117.8(2) . . ?
C6 N2 C10 117.3(3) . . ?
C6 N2 Ru1 117.4(2) . . ?
C10 N2 Ru1 124.8(3) . . ?
C3 O1 C11 117.6(3) . . ?
C8 O2 C12 118.8(3) . . ?
N1 C1 C2 123.7(3) . . ?
C1 C2 C3 118.9(3) . . ?
O1 C3 C2 125.6(3) . . ?
O1 C3 C4 116.2(3) . . ?
C2 C3 C4 118.2(3) . . ?
C5 C4 C3 119.5(3) . . ?
N1 C5 C4 122.2(3) . . ?
N1 C5 C6 113.9(3) . . ?
C4 C5 C6 123.9(3) . . ?
N2 C6 C7 122.6(3) . . ?
N2 C6 C5 114.1(3) . . ?
C7 C6 C5 123.3(3) . . ?
C6 C7 C8 119.0(3) . . ?
O2 C8 C9 116.4(3) . . ?
O2 C8 C7 125.3(3) . . ?
C9 C8 C7 118.2(3) . . ?
C10 C9 C8 119.8(4) . . ?
N2 C10 C9 123.1(4) . . ?
C18 C13 C14 115.8(4) . . ?
C18 C13 C20 122.8(5) . . ?
C14 C13 C20 121.3(5) . . ?
C18 C13 Ru1 69.1(2) . . ?
C14 C13 Ru1 70.1(2) . . ?
C20 C13 Ru1 130.3(3) . . ?
C15 C14 C13 122.6(4) . . ?
C15 C14 Ru1 72.7(2) . . ?
C13 C14 Ru1 72.2(2) . . ?
C14 C15 C16 120.3(4) . . ?
C14 C15 Ru1 70.4(2) . . ?
C16 C15 Ru1 72.6(2) . . ?
C17 C16 C15 118.5(4) . . ?
C17 C16 C19 121.9(5) . . ?
C15 C16 C19 119.5(5) . . ?
C17 C16 Ru1 70.6(2) . . ?
C15 C16 Ru1 70.6(2) . . ?
C19 C16 Ru1 128.7(3) . . ?
C16 C17 C18 121.0(4) . . ?
C16 C17 Ru1 72.9(2) . . ?
C18 C17 Ru1 69.4(2) . . ?
C17 C18 C13 121.7(4) . . ?
C17 C18 Ru1 73.2(2) . . ?
C13 C18 Ru1 73.0(2) . . ?
C22 C20 C13 122.0(6) . . ?
C22 C20 C21 118.9(6) . . ?
C13 C20 C21 108.3(5) . . ?
 
_diffrn_measured_fraction_theta_max    0.996
_diffrn_reflns_theta_full              25.00
_diffrn_measured_fraction_theta_full   0.996
_refine_diff_density_max    0.621
_refine_diff_density_min   -0.427
_refine_diff_density_rms    0.073


#===END

 
data_2TsO
 
_audit_creation_method            SHELXL-97
_chemical_name_systematic
;
 ?
;
_chemical_name_common             ?
_chemical_melting_point           ?
_chemical_formula_moiety          
 'C22 H26 Cl N2 O2 Ru, C7 H7 O3 S'
_chemical_formula_sum
 'C29 H33 Cl N2 O5 Ru S'
_chemical_formula_weight          658.15
 
loop_
 _atom_type_symbol
 _atom_type_description
 _atom_type_scat_dispersion_real
 _atom_type_scat_dispersion_imag
 _atom_type_scat_source
 'C'  'C'   0.0033   0.0016
 'International Tables Vol C Tables 4.2.6.8 and 6.1.1.4'
 'H'  'H'   0.0000   0.0000
 'International Tables Vol C Tables 4.2.6.8 and 6.1.1.4'
 'N'  'N'   0.0061   0.0033
 'International Tables Vol C Tables 4.2.6.8 and 6.1.1.4'
 'O'  'O'   0.0106   0.0060
 'International Tables Vol C Tables 4.2.6.8 and 6.1.1.4'
 'S'  'S'   0.1246   0.1234
 'International Tables Vol C Tables 4.2.6.8 and 6.1.1.4'
 'Cl'  'Cl'   0.1484   0.1585
 'International Tables Vol C Tables 4.2.6.8 and 6.1.1.4'
 'Ru'  'Ru'  -1.2594   0.8363
 'International Tables Vol C Tables 4.2.6.8 and 6.1.1.4'
 
_symmetry_cell_setting            monoclinic
_symmetry_space_group_name_H-M    P21/c
 
loop_
 _symmetry_equiv_pos_as_xyz
 'x, y, z'
 '-x, y+1/2, -z+1/2'
 '-x, -y, -z'
 'x, -y-1/2, z-1/2'
 
_cell_length_a                    11.661(7)
_cell_length_b                    15.563(9)
_cell_length_c                    15.802(9)
_cell_angle_alpha                 90.00
_cell_angle_beta                  96.611(11)
_cell_angle_gamma                 90.00
_cell_volume                      2849(3)
_cell_formula_units_Z             4
_cell_measurement_temperature     100(2)
_cell_measurement_reflns_used     3840
_cell_measurement_theta_min       2.197
_cell_measurement_theta_max       21.419
 
_exptl_crystal_description        plate
_exptl_crystal_colour             yellow
_exptl_crystal_size_max           0.12
_exptl_crystal_size_mid           0.10
_exptl_crystal_size_min           0.10
_exptl_crystal_density_meas       ?
_exptl_crystal_density_diffrn     1.535
_exptl_crystal_density_method     'not measured'
_exptl_crystal_F_000              1352
_exptl_absorpt_coefficient_mu     0.759
_exptl_absorpt_correction_type    multi-scan
_exptl_absorpt_correction_T_min   0.9144
_exptl_absorpt_correction_T_max   0.9280
_exptl_absorpt_process_details    SADABS
 
_exptl_special_details
;
 ?
;
 
_diffrn_ambient_temperature       100(2)
_diffrn_radiation_wavelength      0.71073
_diffrn_radiation_type            MoK\a
_diffrn_radiation_source          'fine-focus sealed tube'
_diffrn_radiation_monochromator   graphite
_diffrn_measurement_device_type   'CCD area detector'
_diffrn_measurement_method        'omega and phi scans'
_diffrn_detector_area_resol_mean  ?
_diffrn_standards_number          ?
_diffrn_standards_interval_count  ?
_diffrn_standards_interval_time   ?
_diffrn_standards_decay_%         ?
_diffrn_reflns_number             27786
_diffrn_reflns_av_R_equivalents   0.1178
_diffrn_reflns_av_sigmaI/netI     0.0917
_diffrn_reflns_limit_h_min        -13
_diffrn_reflns_limit_h_max        13
_diffrn_reflns_limit_k_min        -18
_diffrn_reflns_limit_k_max        18
_diffrn_reflns_limit_l_min        -18
_diffrn_reflns_limit_l_max        18
_diffrn_reflns_theta_min          1.76
_diffrn_reflns_theta_max          25.00
_reflns_number_total              5028
_reflns_number_gt                 3826
_reflns_threshold_expression      >2sigma(I)
 
_computing_data_collection        ?
_computing_cell_refinement        ?
_computing_data_reduction         ?
_computing_structure_solution     ?
_computing_structure_refinement   'SHELXL-97 (Sheldrick, 1997)'
_computing_molecular_graphics     ?
_computing_publication_material   ?
 
_refine_special_details
;
 Refinement of F^2^ against ALL reflections.  The weighted R-factor wR and
 goodness of fit S are based on F^2^, conventional R-factors R are based
 on F, with F set to zero for negative F^2^. The threshold expression of
 F^2^ > 2sigma(F^2^) is used only for calculating R-factors(gt) etc. and is
 not relevant to the choice of reflections for refinement.  R-factors based
 on F^2^ are statistically about twice as large as those based on F, and R-
 factors based on ALL data will be even larger.
;
 
_refine_ls_structure_factor_coef  Fsqd
_refine_ls_matrix_type            full
_refine_ls_weighting_scheme       calc
_refine_ls_weighting_details
 'calc w=1/[\s^2^(Fo^2^)+(0.0366P)^2^+0.0000P] where P=(Fo^2^+2Fc^2^)/3'
_atom_sites_solution_primary      direct
_atom_sites_solution_secondary    difmap
_atom_sites_solution_hydrogens    geom
_refine_ls_hydrogen_treatment     constr
_refine_ls_extinction_method      none
_refine_ls_extinction_coef        ?
_refine_ls_number_reflns          5028
_refine_ls_number_parameters      358
_refine_ls_number_restraints      0
_refine_ls_R_factor_all           0.0750
_refine_ls_R_factor_gt            0.0544
_refine_ls_wR_factor_ref          0.1068
_refine_ls_wR_factor_gt           0.0983
_refine_ls_goodness_of_fit_ref    0.966
_refine_ls_restrained_S_all       0.966
_refine_ls_shift/su_max           0.003
_refine_ls_shift/su_mean          0.000
 
loop_
 _atom_site_label
 _atom_site_type_symbol
 _atom_site_fract_x
 _atom_site_fract_y
 _atom_site_fract_z
 _atom_site_U_iso_or_equiv
 _atom_site_adp_type
 _atom_site_occupancy
 _atom_site_symmetry_multiplicity
 _atom_site_calc_flag
 _atom_site_refinement_flags
 _atom_site_disorder_assembly
 _atom_site_disorder_group
Ru1 Ru 0.06283(3) 0.21190(2) 0.17070(2) 0.03407(13) Uani 1 1 d . . .
Cl1 Cl 0.01948(12) 0.22464(7) 0.01846(7) 0.0519(3) Uani 1 1 d . . .
S1 S 0.55793(11) 0.24981(8) 0.20012(8) 0.0470(3) Uani 1 1 d . . .
N1 N -0.0538(3) 0.1093(2) 0.1569(2) 0.0331(8) Uani 1 1 d . . .
N2 N 0.1647(3) 0.1086(2) 0.1415(2) 0.0352(9) Uani 1 1 d . . .
O1 O -0.2642(2) -0.10036(19) 0.0981(2) 0.0469(8) Uani 1 1 d . . .
O2 O 0.3529(2) -0.09389(19) 0.0618(2) 0.0487(8) Uani 1 1 d . . .
O3 O 0.4815(3) 0.2276(2) 0.2629(2) 0.0616(10) Uani 1 1 d . . .
O4 O 0.5475(3) 0.1915(2) 0.1287(2) 0.0674(11) Uani 1 1 d . . .
O5 O 0.6762(3) 0.2632(2) 0.2372(2) 0.0628(10) Uani 1 1 d . . .
C1 C -0.1670(4) 0.1140(3) 0.1651(3) 0.0437(12) Uani 1 1 d . . .
H1 H -0.1958 0.1657 0.1832 0.052 Uiso 1 1 calc R . .
C2 C -0.2423(4) 0.0473(3) 0.1482(3) 0.0429(11) Uani 1 1 d . . .
H2 H -0.3198 0.0537 0.1556 0.051 Uiso 1 1 calc R . .
C3 C -0.2018(4) -0.0299(3) 0.1200(3) 0.0361(10) Uani 1 1 d . . .
C4 C -0.0836(4) -0.0362(3) 0.1108(2) 0.0351(10) Uani 1 1 d . . .
H4 H -0.0535 -0.0872 0.0919 0.042 Uiso 1 1 calc R . .
C5 C -0.0131(3) 0.0331(3) 0.1298(2) 0.0306(10) Uani 1 1 d . . .
C6 C 0.1110(3) 0.0327(3) 0.1220(2) 0.0307(10) Uani 1 1 d . . .
C7 C 0.1697(3) -0.0384(3) 0.0964(2) 0.0319(10) Uani 1 1 d . . .
H7 H 0.1314 -0.0902 0.0847 0.038 Uiso 1 1 calc R . .
C8 C 0.2863(4) -0.0312(3) 0.0886(3) 0.0363(10) Uani 1 1 d . . .
C9 C 0.3409(4) 0.0465(3) 0.1085(3) 0.0416(11) Uani 1 1 d . . .
H9 H 0.4194 0.0527 0.1046 0.050 Uiso 1 1 calc R . .
C10 C 0.2784(4) 0.1137(3) 0.1340(3) 0.0431(11) Uani 1 1 d . . .
H10 H 0.3160 0.1656 0.1468 0.052 Uiso 1 1 calc R . .
C11 C -0.3867(4) -0.0965(3) 0.1024(4) 0.0680(16) Uani 1 1 d . . .
H11A H -0.4008 -0.0851 0.1600 0.102 Uiso 1 1 calc R . .
H11B H -0.4212 -0.1504 0.0843 0.102 Uiso 1 1 calc R . .
H11C H -0.4197 -0.0515 0.0659 0.102 Uiso 1 1 calc R . .
C12 C 0.3046(4) -0.1784(3) 0.0479(3) 0.0522(13) Uani 1 1 d . . .
H12A H 0.2862 -0.2016 0.1009 0.078 Uiso 1 1 calc R . .
H12B H 0.3596 -0.2150 0.0249 0.078 Uiso 1 1 calc R . .
H12C H 0.2356 -0.1750 0.0084 0.078 Uiso 1 1 calc R . .
C13 C 0.1484(4) 0.2349(3) 0.3010(3) 0.0413(12) Uani 1 1 d . . .
C14 C 0.2029(4) 0.2840(3) 0.2427(3) 0.0456(12) Uani 1 1 d . . .
H14 H 0.2825 0.2795 0.2430 0.055 Uiso 1 1 calc R . .
C15 C 0.1419(5) 0.3390(3) 0.1848(3) 0.0536(14) Uani 1 1 d . . .
H15 H 0.1808 0.3686 0.1456 0.064 Uiso 1 1 calc R . .
C16 C 0.0206(5) 0.3511(3) 0.1844(3) 0.0502(13) Uani 1 1 d . . .
C17 C -0.0337(4) 0.3023(3) 0.2420(3) 0.0492(13) Uani 1 1 d . . .
H17 H -0.1127 0.3084 0.2435 0.059 Uiso 1 1 calc R . .
C18 C 0.0289(4) 0.2431(3) 0.2987(3) 0.0454(12) Uani 1 1 d . . .
H18 H -0.0104 0.2096 0.3347 0.055 Uiso 1 1 calc R . .
C19 C 0.2171(5) 0.1762(3) 0.3632(3) 0.0685(17) Uani 1 1 d . . .
H19A H 0.2453 0.2080 0.4133 0.103 Uiso 1 1 calc R . .
H19B H 0.2811 0.1531 0.3375 0.103 Uiso 1 1 calc R . .
H19C H 0.1688 0.1301 0.3784 0.103 Uiso 1 1 calc R . .
C20 C -0.0393(6) 0.4125(3) 0.1192(4) 0.084(2) Uani 1 1 d . . .
H20 H -0.0253 0.3919 0.0627 0.100 Uiso 1 1 calc R . .
C21 C 0.0141(7) 0.5017(4) 0.1308(4) 0.106(2) Uani 1 1 d . . .
H21A H -0.0196 0.5389 0.0863 0.160 Uiso 1 1 calc R . .
H21B H 0.0959 0.4979 0.1284 0.160 Uiso 1 1 calc R . .
H21C H -0.0002 0.5245 0.1851 0.160 Uiso 1 1 calc R . .
C22 C -0.1665(7) 0.4141(5) 0.1216(6) 0.164(4) Uani 1 1 d . . .
H22A H -0.1966 0.3568 0.1143 0.246 Uiso 1 1 calc R . .
H22B H -0.2018 0.4501 0.0765 0.246 Uiso 1 1 calc R . .
H22C H -0.1833 0.4363 0.1755 0.246 Uiso 1 1 calc R . .
C31 C 0.5074(4) 0.3514(3) 0.1600(3) 0.0405(11) Uani 1 1 d . . .
C32 C 0.5397(4) 0.4255(3) 0.2026(3) 0.0551(14) Uani 1 1 d . . .
H32 H 0.5934 0.4223 0.2508 0.066 Uiso 1 1 calc R . .
C33 C 0.4964(5) 0.5039(3) 0.1774(3) 0.0630(15) Uani 1 1 d . . .
H33 H 0.5209 0.5527 0.2083 0.076 Uiso 1 1 calc R . .
C34 C 0.4167(5) 0.5113(3) 0.1065(4) 0.0716(18) Uani 1 1 d . . .
C35 C 0.3843(6) 0.4361(4) 0.0629(4) 0.100(3) Uani 1 1 d . . .
H35 H 0.3307 0.4391 0.0146 0.120 Uiso 1 1 calc R . .
C36 C 0.4286(5) 0.3575(3) 0.0888(3) 0.0745(18) Uani 1 1 d . . .
H36 H 0.4052 0.3084 0.0580 0.089 Uiso 1 1 calc R . .
C37 C 0.3677(7) 0.5981(4) 0.0799(4) 0.123(3) Uani 1 1 d . . .
H37A H 0.4101 0.6421 0.1126 0.184 Uiso 1 1 calc R . .
H37B H 0.2880 0.6005 0.0896 0.184 Uiso 1 1 calc R . .
H37C H 0.3739 0.6070 0.0205 0.184 Uiso 1 1 calc R . .
 
loop_
 _atom_site_aniso_label
 _atom_site_aniso_U_11
 _atom_site_aniso_U_22
 _atom_site_aniso_U_33
 _atom_site_aniso_U_23
 _atom_site_aniso_U_13
 _atom_site_aniso_U_12
Ru1 0.0360(2) 0.0300(2) 0.0348(2) -0.00541(16) -0.00224(16) 0.00377(16)
Cl1 0.0694(9) 0.0468(7) 0.0382(6) -0.0035(5) 0.0006(6) 0.0033(6)
S1 0.0400(7) 0.0410(7) 0.0599(8) -0.0045(6) 0.0052(6) 0.0042(6)
N1 0.028(2) 0.035(2) 0.0356(19) -0.0038(16) 0.0009(16) 0.0032(16)
N2 0.028(2) 0.035(2) 0.041(2) -0.0054(17) -0.0018(16) 0.0001(16)
O1 0.0287(17) 0.0413(19) 0.070(2) -0.0004(16) 0.0017(16) -0.0030(14)
O2 0.0321(18) 0.0384(19) 0.075(2) -0.0134(17) 0.0043(16) 0.0044(14)
O3 0.058(2) 0.058(2) 0.072(2) 0.0189(18) 0.020(2) 0.0077(18)
O4 0.068(3) 0.049(2) 0.084(2) -0.021(2) 0.004(2) 0.0072(18)
O5 0.037(2) 0.064(2) 0.086(3) -0.006(2) -0.0020(19) 0.0054(17)
C1 0.042(3) 0.037(3) 0.051(3) -0.007(2) 0.003(2) 0.011(2)
C2 0.026(2) 0.044(3) 0.059(3) 0.002(2) 0.008(2) 0.007(2)
C3 0.030(2) 0.040(3) 0.038(2) 0.005(2) 0.001(2) 0.003(2)
C4 0.036(3) 0.034(2) 0.034(2) -0.0003(19) 0.001(2) 0.007(2)
C5 0.030(2) 0.034(2) 0.027(2) -0.0022(18) -0.0006(18) 0.0068(19)
C6 0.031(2) 0.034(2) 0.026(2) -0.0010(18) -0.0025(18) 0.0011(19)
C7 0.029(2) 0.030(2) 0.036(2) -0.0019(19) -0.0003(19) 0.0012(18)
C8 0.030(3) 0.038(3) 0.041(3) -0.002(2) -0.001(2) 0.008(2)
C9 0.027(2) 0.039(3) 0.057(3) -0.005(2) -0.002(2) -0.001(2)
C10 0.036(3) 0.037(3) 0.055(3) -0.004(2) -0.002(2) -0.005(2)
C11 0.031(3) 0.068(4) 0.105(5) 0.003(3) 0.006(3) -0.008(3)
C12 0.051(3) 0.038(3) 0.067(3) -0.010(2) 0.002(3) 0.009(2)
C13 0.051(3) 0.036(3) 0.034(2) -0.002(2) -0.006(2) 0.002(2)
C14 0.044(3) 0.040(3) 0.051(3) -0.022(2) -0.003(2) -0.008(2)
C15 0.080(4) 0.033(3) 0.045(3) -0.007(2) -0.005(3) -0.010(3)
C16 0.076(4) 0.028(3) 0.044(3) -0.009(2) -0.009(3) 0.007(2)
C17 0.049(3) 0.048(3) 0.049(3) -0.023(2) -0.001(3) 0.011(2)
C18 0.059(3) 0.043(3) 0.034(3) -0.009(2) 0.008(2) 0.003(2)
C19 0.078(4) 0.059(3) 0.062(3) 0.003(3) -0.019(3) 0.009(3)
C20 0.132(6) 0.046(4) 0.064(4) -0.012(3) -0.024(4) 0.031(4)
C21 0.141(7) 0.056(4) 0.120(6) 0.031(4) 0.006(5) 0.015(4)
C22 0.112(7) 0.111(7) 0.245(11) 0.075(7) -0.083(7) 0.006(5)
C31 0.043(3) 0.042(3) 0.036(2) -0.002(2) 0.005(2) 0.000(2)
C32 0.064(4) 0.051(3) 0.047(3) -0.008(2) -0.007(3) 0.000(3)
C33 0.088(4) 0.040(3) 0.058(3) -0.008(3) -0.005(3) -0.002(3)
C34 0.102(5) 0.041(3) 0.066(4) 0.008(3) -0.014(3) 0.003(3)
C35 0.142(7) 0.056(4) 0.086(5) 0.002(3) -0.059(5) 0.006(4)
C36 0.103(5) 0.045(3) 0.068(4) -0.012(3) -0.026(3) 0.001(3)
C37 0.185(8) 0.052(4) 0.115(6) 0.010(4) -0.051(6) 0.019(5)
 
_geom_special_details
;
 All esds (except the esd in the dihedral angle between two l.s. planes)
 are estimated using the full covariance matrix.  The cell esds are taken
 into account individually in the estimation of esds in distances, angles
 and torsion angles; correlations between esds in cell parameters are only
 used when they are defined by crystal symmetry.  An approximate (isotropic)
 treatment of cell esds is used for estimating esds involving l.s. planes.
;
 
loop_
 _geom_bond_atom_site_label_1
 _geom_bond_atom_site_label_2
 _geom_bond_distance
 _geom_bond_site_symmetry_2
 _geom_bond_publ_flag
Ru1 N2 2.082(3) . ?
Ru1 N1 2.092(3) . ?
Ru1 C18 2.161(5) . ?
Ru1 C15 2.184(5) . ?
Ru1 C14 2.190(4) . ?
Ru1 C17 2.192(5) . ?
Ru1 C13 2.211(4) . ?
Ru1 C16 2.237(5) . ?
Ru1 Cl1 2.4088(18) . ?
S1 O4 1.442(4) . ?
S1 O3 1.450(4) . ?
S1 O5 1.450(3) . ?
S1 C31 1.779(5) . ?
N1 C1 1.344(5) . ?
N1 C5 1.363(5) . ?
N2 C10 1.348(5) . ?
N2 C6 1.356(5) . ?
O1 C3 1.340(5) . ?
O1 C11 1.439(5) . ?
O2 C8 1.346(5) . ?
O2 C12 1.437(5) . ?
C1 C2 1.366(6) . ?
C2 C3 1.383(6) . ?
C3 C4 1.406(6) . ?
C4 C5 1.369(5) . ?
C5 C6 1.467(6) . ?
C6 C7 1.386(5) . ?
C7 C8 1.383(6) . ?
C8 C9 1.387(6) . ?
C9 C10 1.361(6) . ?
C13 C18 1.395(6) . ?
C13 C14 1.404(6) . ?
C13 C19 1.503(6) . ?
C14 C15 1.389(6) . ?
C15 C16 1.426(7) . ?
C16 C17 1.392(7) . ?
C16 C20 1.516(7) . ?
C17 C18 1.426(6) . ?
C20 C22 1.489(10) . ?
C20 C21 1.524(8) . ?
C31 C32 1.366(6) . ?
C31 C36 1.373(6) . ?
C32 C33 1.362(6) . ?
C33 C34 1.375(7) . ?
C34 C35 1.389(7) . ?
C34 C37 1.507(7) . ?
C35 C36 1.371(7) . ?
 
loop_
 _geom_angle_atom_site_label_1
 _geom_angle_atom_site_label_2
 _geom_angle_atom_site_label_3
 _geom_angle
 _geom_angle_site_symmetry_1
 _geom_angle_site_symmetry_3
 _geom_angle_publ_flag
N2 Ru1 N1 76.58(14) . . ?
N2 Ru1 C18 123.49(15) . . ?
N1 Ru1 C18 94.73(16) . . ?
N2 Ru1 C15 118.51(18) . . ?
N1 Ru1 C15 164.58(17) . . ?
C18 Ru1 C15 79.71(19) . . ?
N2 Ru1 C14 95.76(16) . . ?
N1 Ru1 C14 151.91(16) . . ?
C18 Ru1 C14 66.68(19) . . ?
C15 Ru1 C14 37.02(16) . . ?
N2 Ru1 C17 161.65(16) . . ?
N1 Ru1 C17 100.22(17) . . ?
C18 Ru1 C17 38.25(16) . . ?
C15 Ru1 C17 66.5(2) . . ?
C14 Ru1 C17 78.51(18) . . ?
N2 Ru1 C13 97.11(15) . . ?
N1 Ru1 C13 116.02(15) . . ?
C18 Ru1 C13 37.20(17) . . ?
C15 Ru1 C13 67.57(17) . . ?
C14 Ru1 C13 37.21(16) . . ?
C17 Ru1 C13 67.74(17) . . ?
N2 Ru1 C16 155.03(19) . . ?
N1 Ru1 C16 126.97(17) . . ?
C18 Ru1 C16 68.03(18) . . ?
C15 Ru1 C16 37.62(19) . . ?
C14 Ru1 C16 67.24(17) . . ?
C17 Ru1 C16 36.63(18) . . ?
C13 Ru1 C16 80.46(16) . . ?
N2 Ru1 Cl1 84.35(9) . . ?
N1 Ru1 Cl1 84.23(9) . . ?
C18 Ru1 Cl1 151.23(13) . . ?
C15 Ru1 Cl1 93.72(13) . . ?
C14 Ru1 Cl1 122.36(14) . . ?
C17 Ru1 Cl1 113.52(13) . . ?
C13 Ru1 Cl1 159.55(14) . . ?
C16 Ru1 Cl1 89.63(12) . . ?
O4 S1 O3 112.5(2) . . ?
O4 S1 O5 113.4(2) . . ?
O3 S1 O5 112.8(2) . . ?
O4 S1 C31 106.6(2) . . ?
O3 S1 C31 104.6(2) . . ?
O5 S1 C31 106.0(2) . . ?
C1 N1 C5 117.3(4) . . ?
C1 N1 Ru1 125.6(3) . . ?
C5 N1 Ru1 116.8(3) . . ?
C10 N2 C6 117.7(4) . . ?
C10 N2 Ru1 124.5(3) . . ?
C6 N2 Ru1 117.6(3) . . ?
C3 O1 C11 117.8(4) . . ?
C8 O2 C12 118.7(4) . . ?
N1 C1 C2 123.8(4) . . ?
C1 C2 C3 119.1(4) . . ?
O1 C3 C2 126.8(4) . . ?
O1 C3 C4 115.2(4) . . ?
C2 C3 C4 118.0(4) . . ?
C5 C4 C3 119.5(4) . . ?
N1 C5 C4 122.2(4) . . ?
N1 C5 C6 114.4(4) . . ?
C4 C5 C6 123.4(4) . . ?
N2 C6 C7 122.1(4) . . ?
N2 C6 C5 114.2(4) . . ?
C7 C6 C5 123.7(4) . . ?
C8 C7 C6 119.0(4) . . ?
O2 C8 C7 125.3(4) . . ?
O2 C8 C9 115.9(4) . . ?
C7 C8 C9 118.7(4) . . ?
C10 C9 C8 119.3(4) . . ?
N2 C10 C9 123.1(4) . . ?
C18 C13 C14 117.4(4) . . ?
C18 C13 C19 121.9(5) . . ?
C14 C13 C19 120.7(5) . . ?
C18 C13 Ru1 69.5(2) . . ?
C14 C13 Ru1 70.6(2) . . ?
C19 C13 Ru1 131.3(3) . . ?
C15 C14 C13 122.1(5) . . ?
C15 C14 Ru1 71.2(3) . . ?
C13 C14 Ru1 72.2(3) . . ?
C14 C15 C16 121.1(5) . . ?
C14 C15 Ru1 71.7(3) . . ?
C16 C15 Ru1 73.2(3) . . ?
C17 C16 C15 116.8(4) . . ?
C17 C16 C20 125.4(5) . . ?
C15 C16 C20 117.7(5) . . ?
C17 C16 Ru1 69.9(3) . . ?
C15 C16 Ru1 69.2(3) . . ?
C20 C16 Ru1 129.4(3) . . ?
C16 C17 C18 121.7(5) . . ?
C16 C17 Ru1 73.5(3) . . ?
C18 C17 Ru1 69.7(3) . . ?
C13 C18 C17 120.8(5) . . ?
C13 C18 Ru1 73.3(3) . . ?
C17 C18 Ru1 72.1(3) . . ?
C22 C20 C16 112.1(6) . . ?
C22 C20 C21 112.2(6) . . ?
C16 C20 C21 110.0(5) . . ?
C32 C31 C36 117.9(5) . . ?
C32 C31 S1 120.9(3) . . ?
C36 C31 S1 121.1(4) . . ?
C33 C32 C31 122.6(5) . . ?
C32 C33 C34 120.5(5) . . ?
C33 C34 C35 116.9(5) . . ?
C33 C34 C37 120.1(5) . . ?
C35 C34 C37 123.0(5) . . ?
C36 C35 C34 122.2(5) . . ?
C35 C36 C31 120.0(5) . . ?
 
_diffrn_measured_fraction_theta_max    1.000
_diffrn_reflns_theta_full              25.00
_diffrn_measured_fraction_theta_full   1.000
_refine_diff_density_max    1.165
_refine_diff_density_min   -1.287
_refine_diff_density_rms    0.103
